# Supplementary figures and images for: Evaluating the effect of metabolic traits on oral and oropharyngeal cancer risk using Mendelian randomization
Source: eLife journal article supplement (doi:10.7554/elife.82674), 2023-04-12

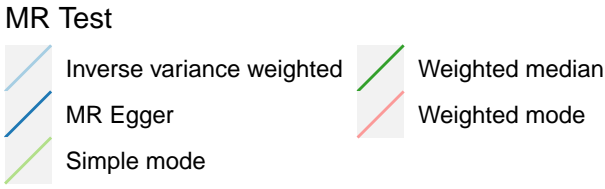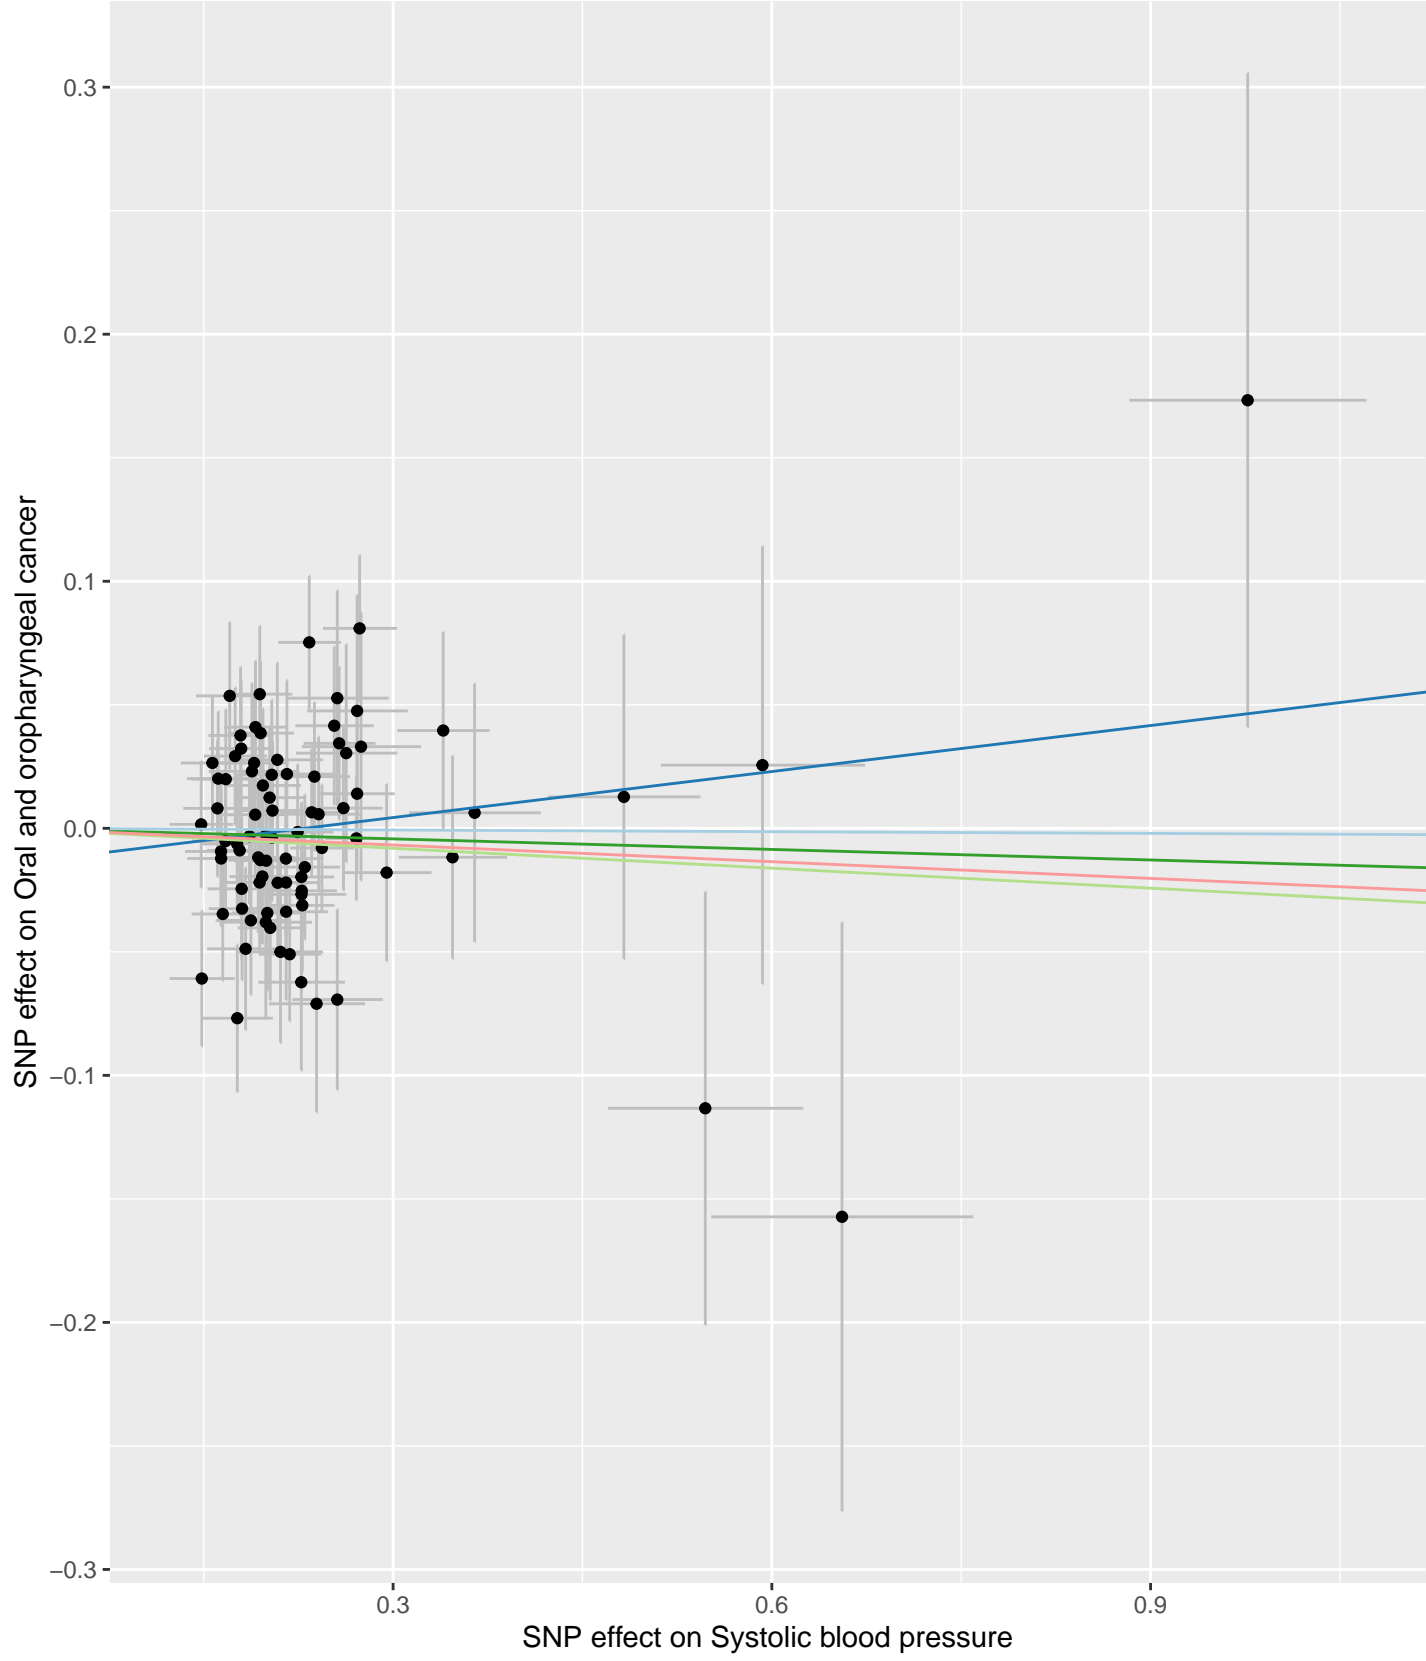

Supplement: supp [file elife-82674-supp-v1.zip]

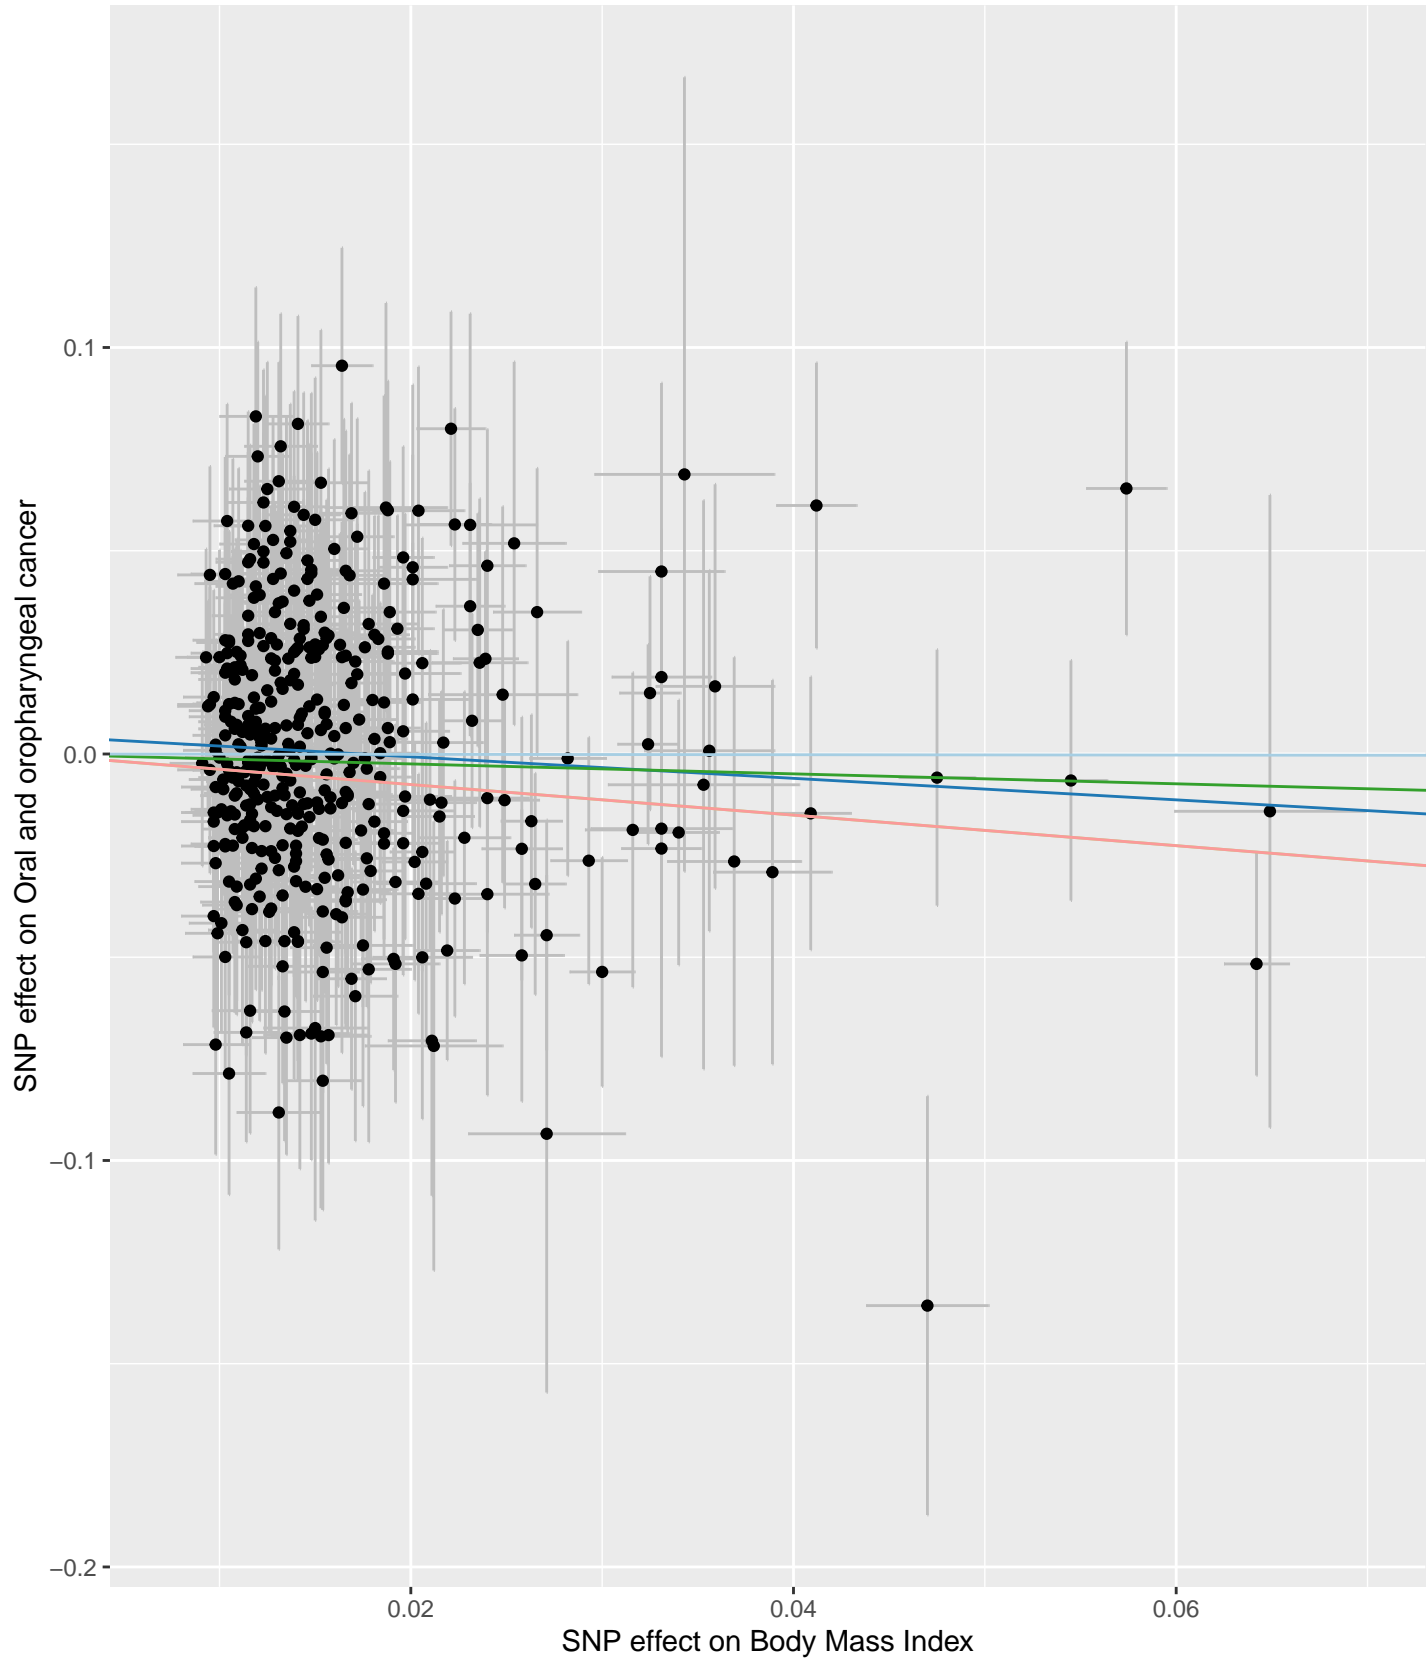

Supplement: supp [file elife-82674-supp-v1.zip]

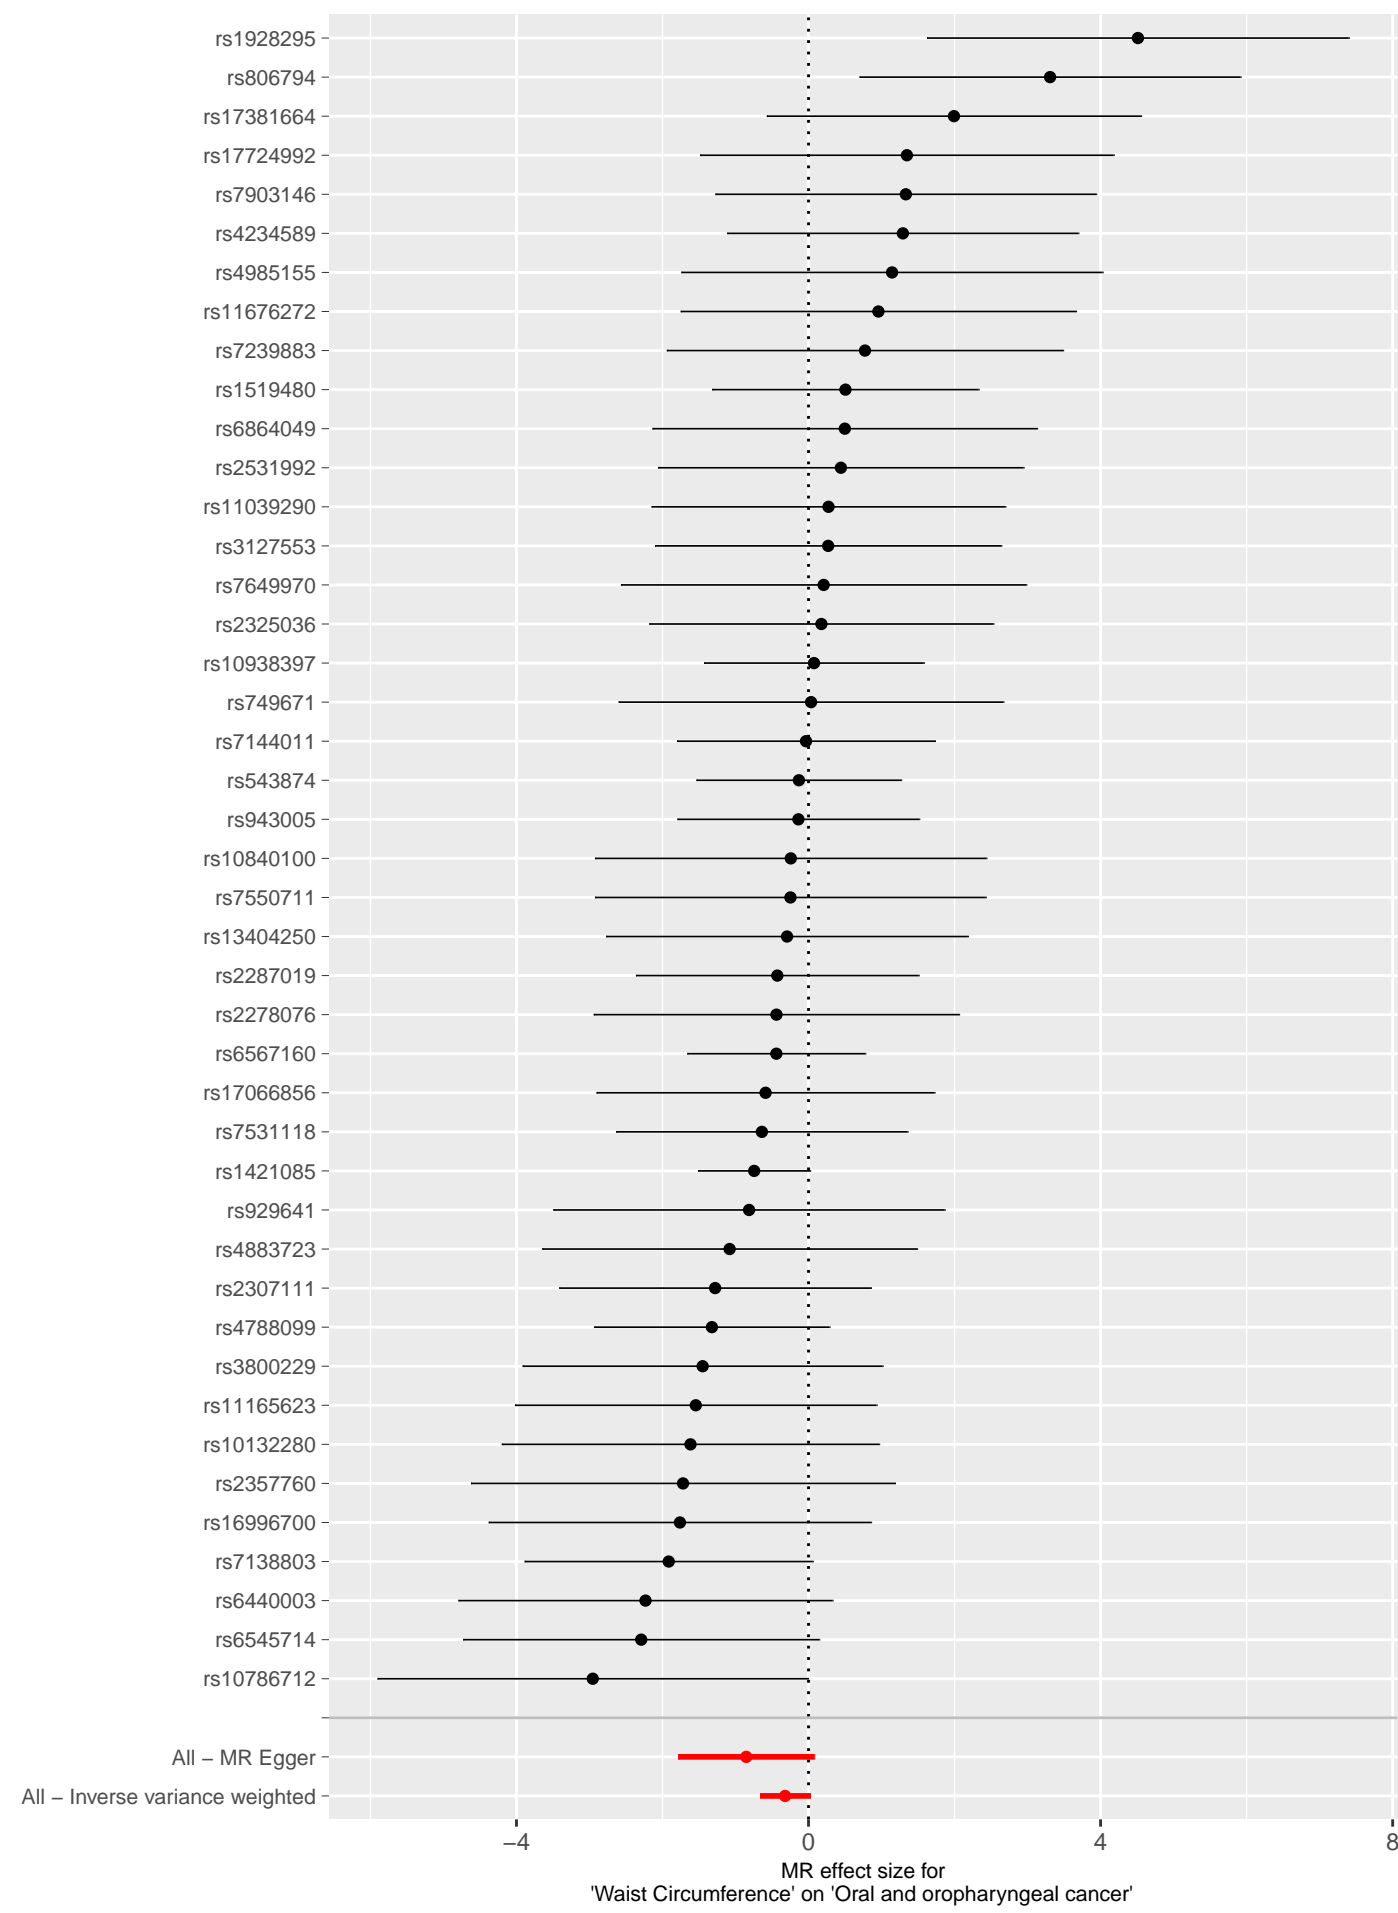

Supplement: supp [file elife-82674-supp-v1.zip]

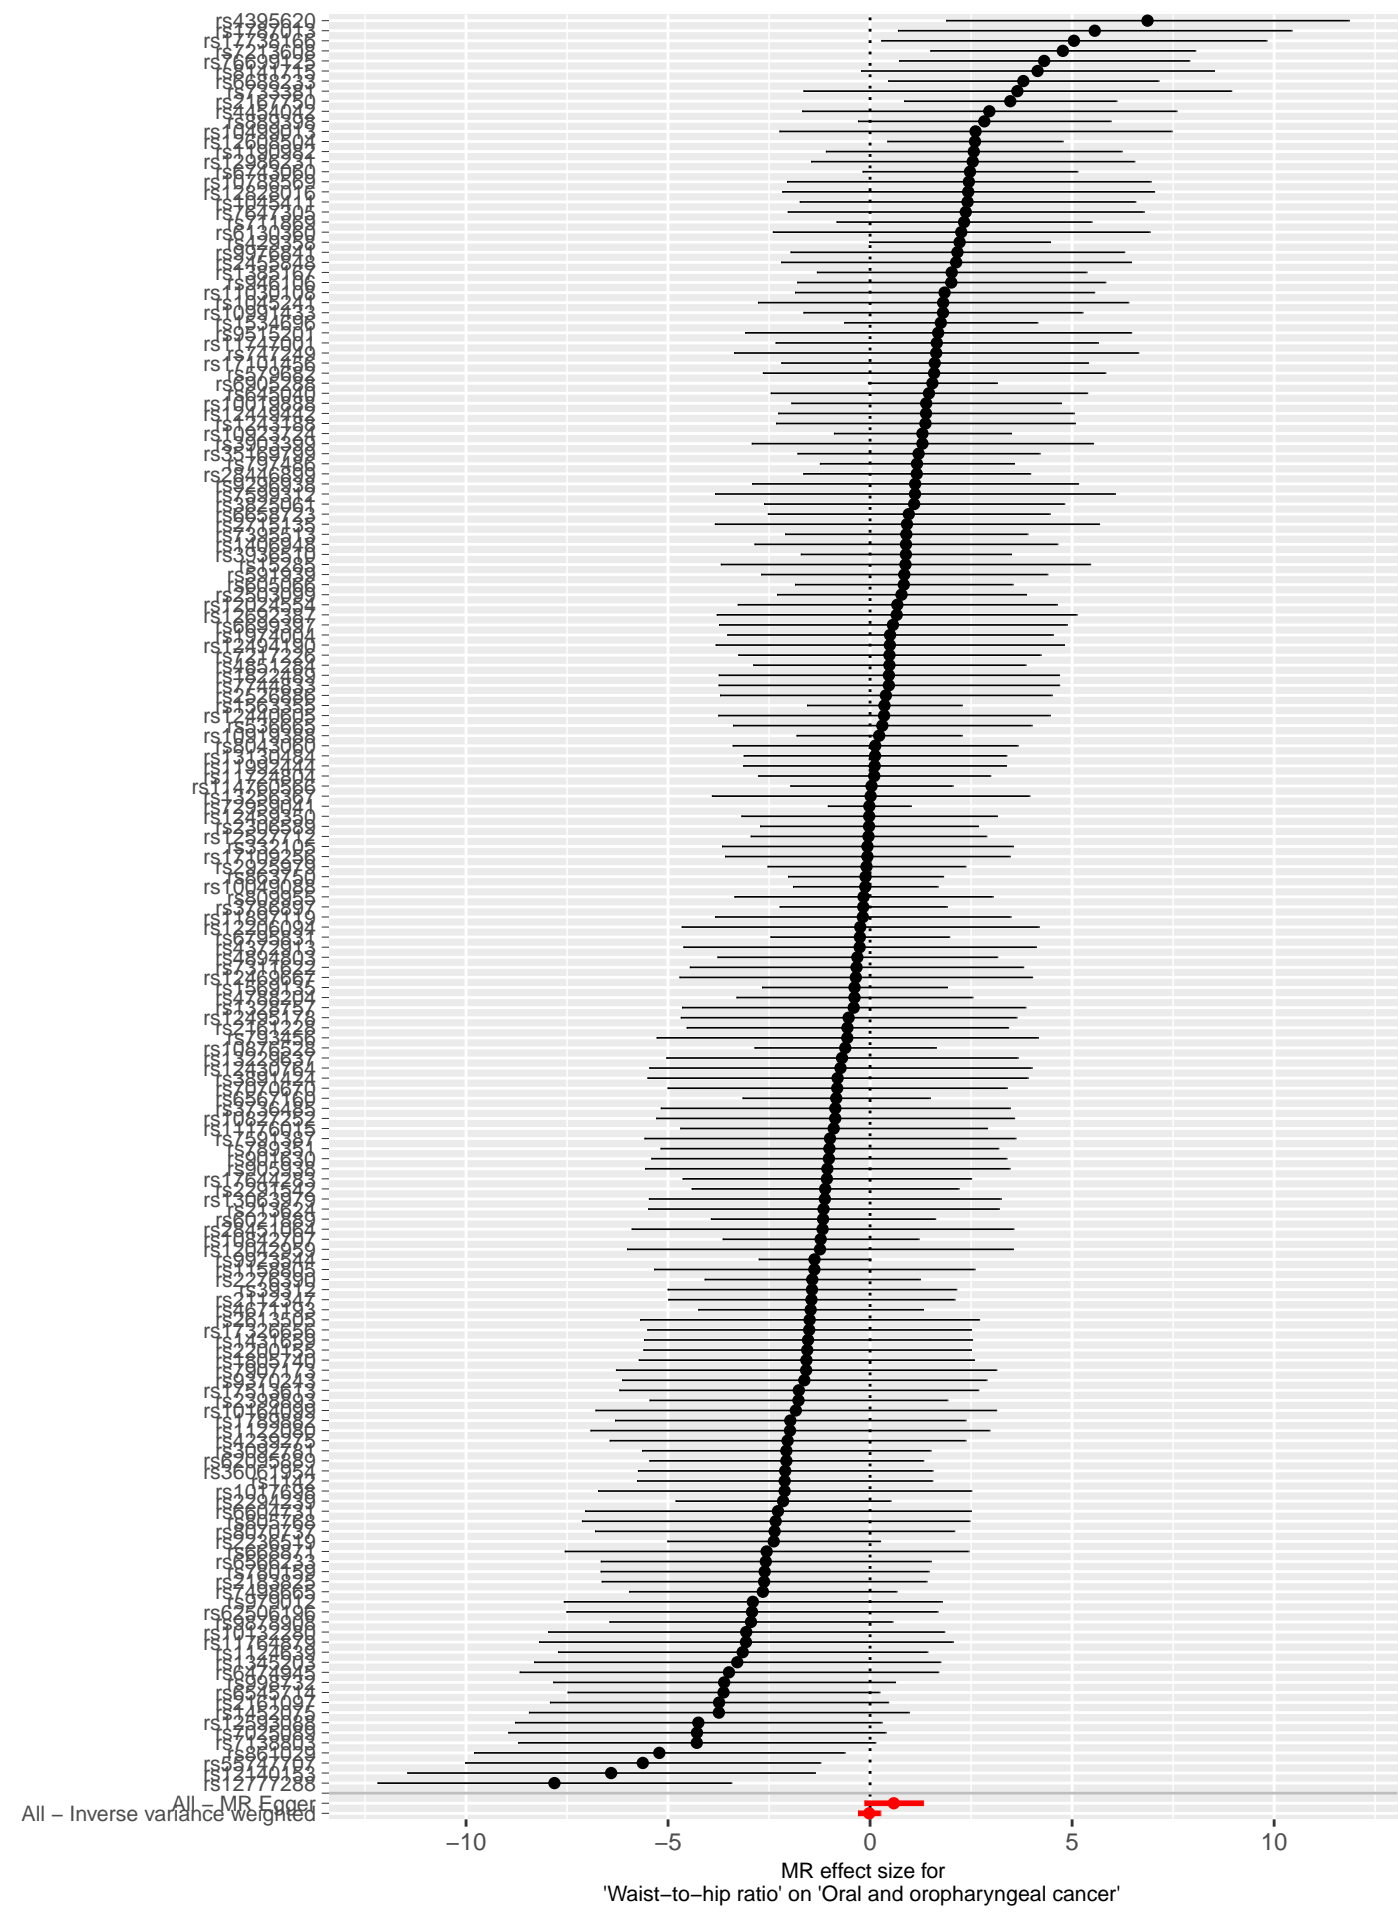

Supplement: supp [file elife-82674-supp-v1.zip]

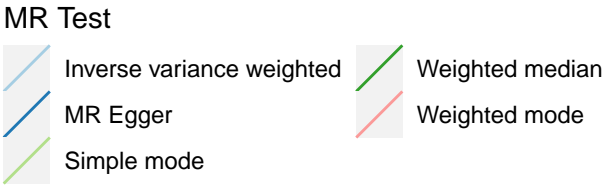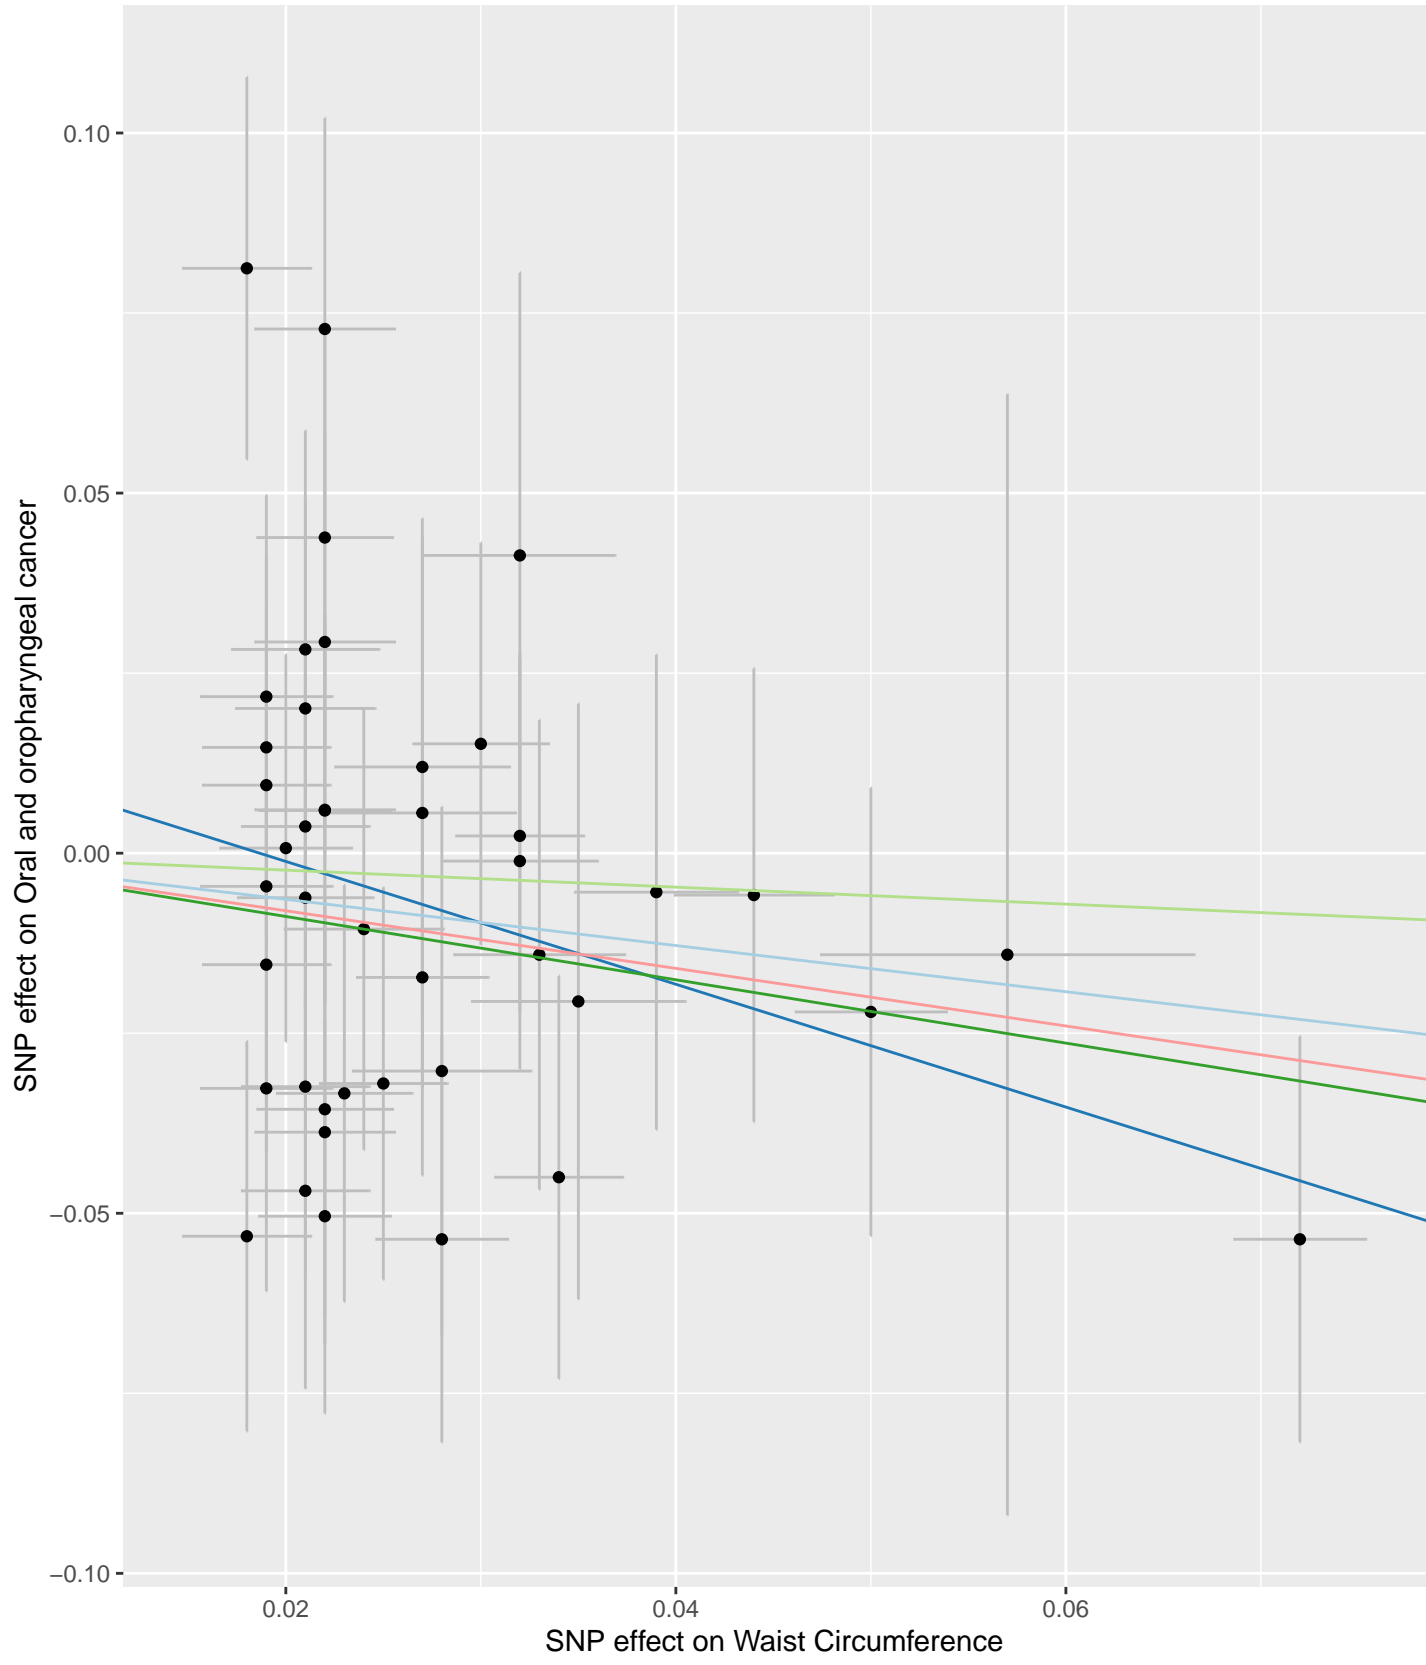

Supplement: supp [file elife-82674-supp-v1.zip]

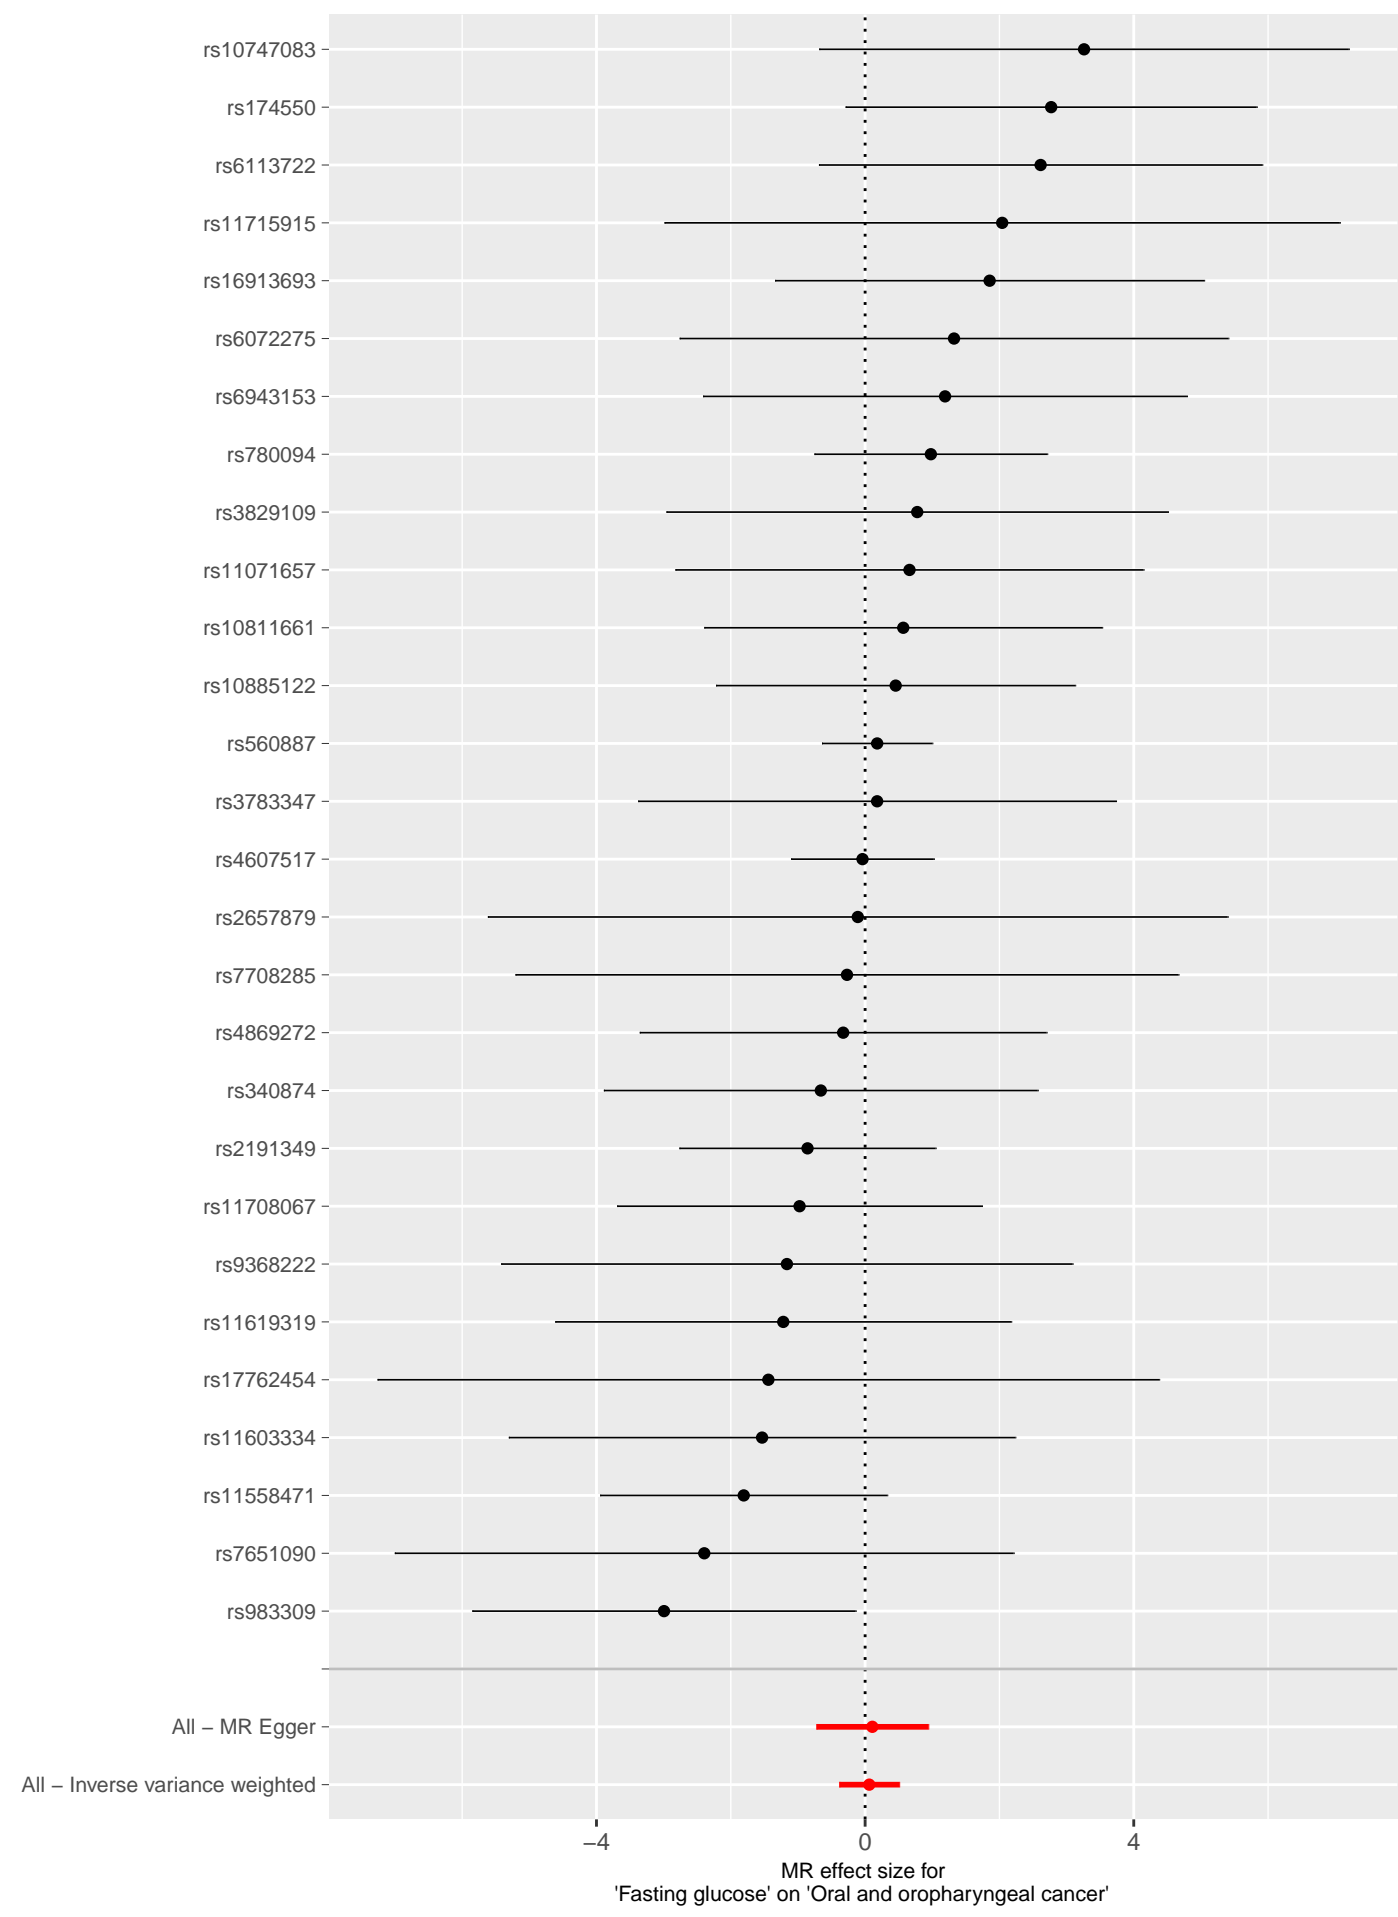

Supplement: supp [file elife-82674-supp-v1.zip]

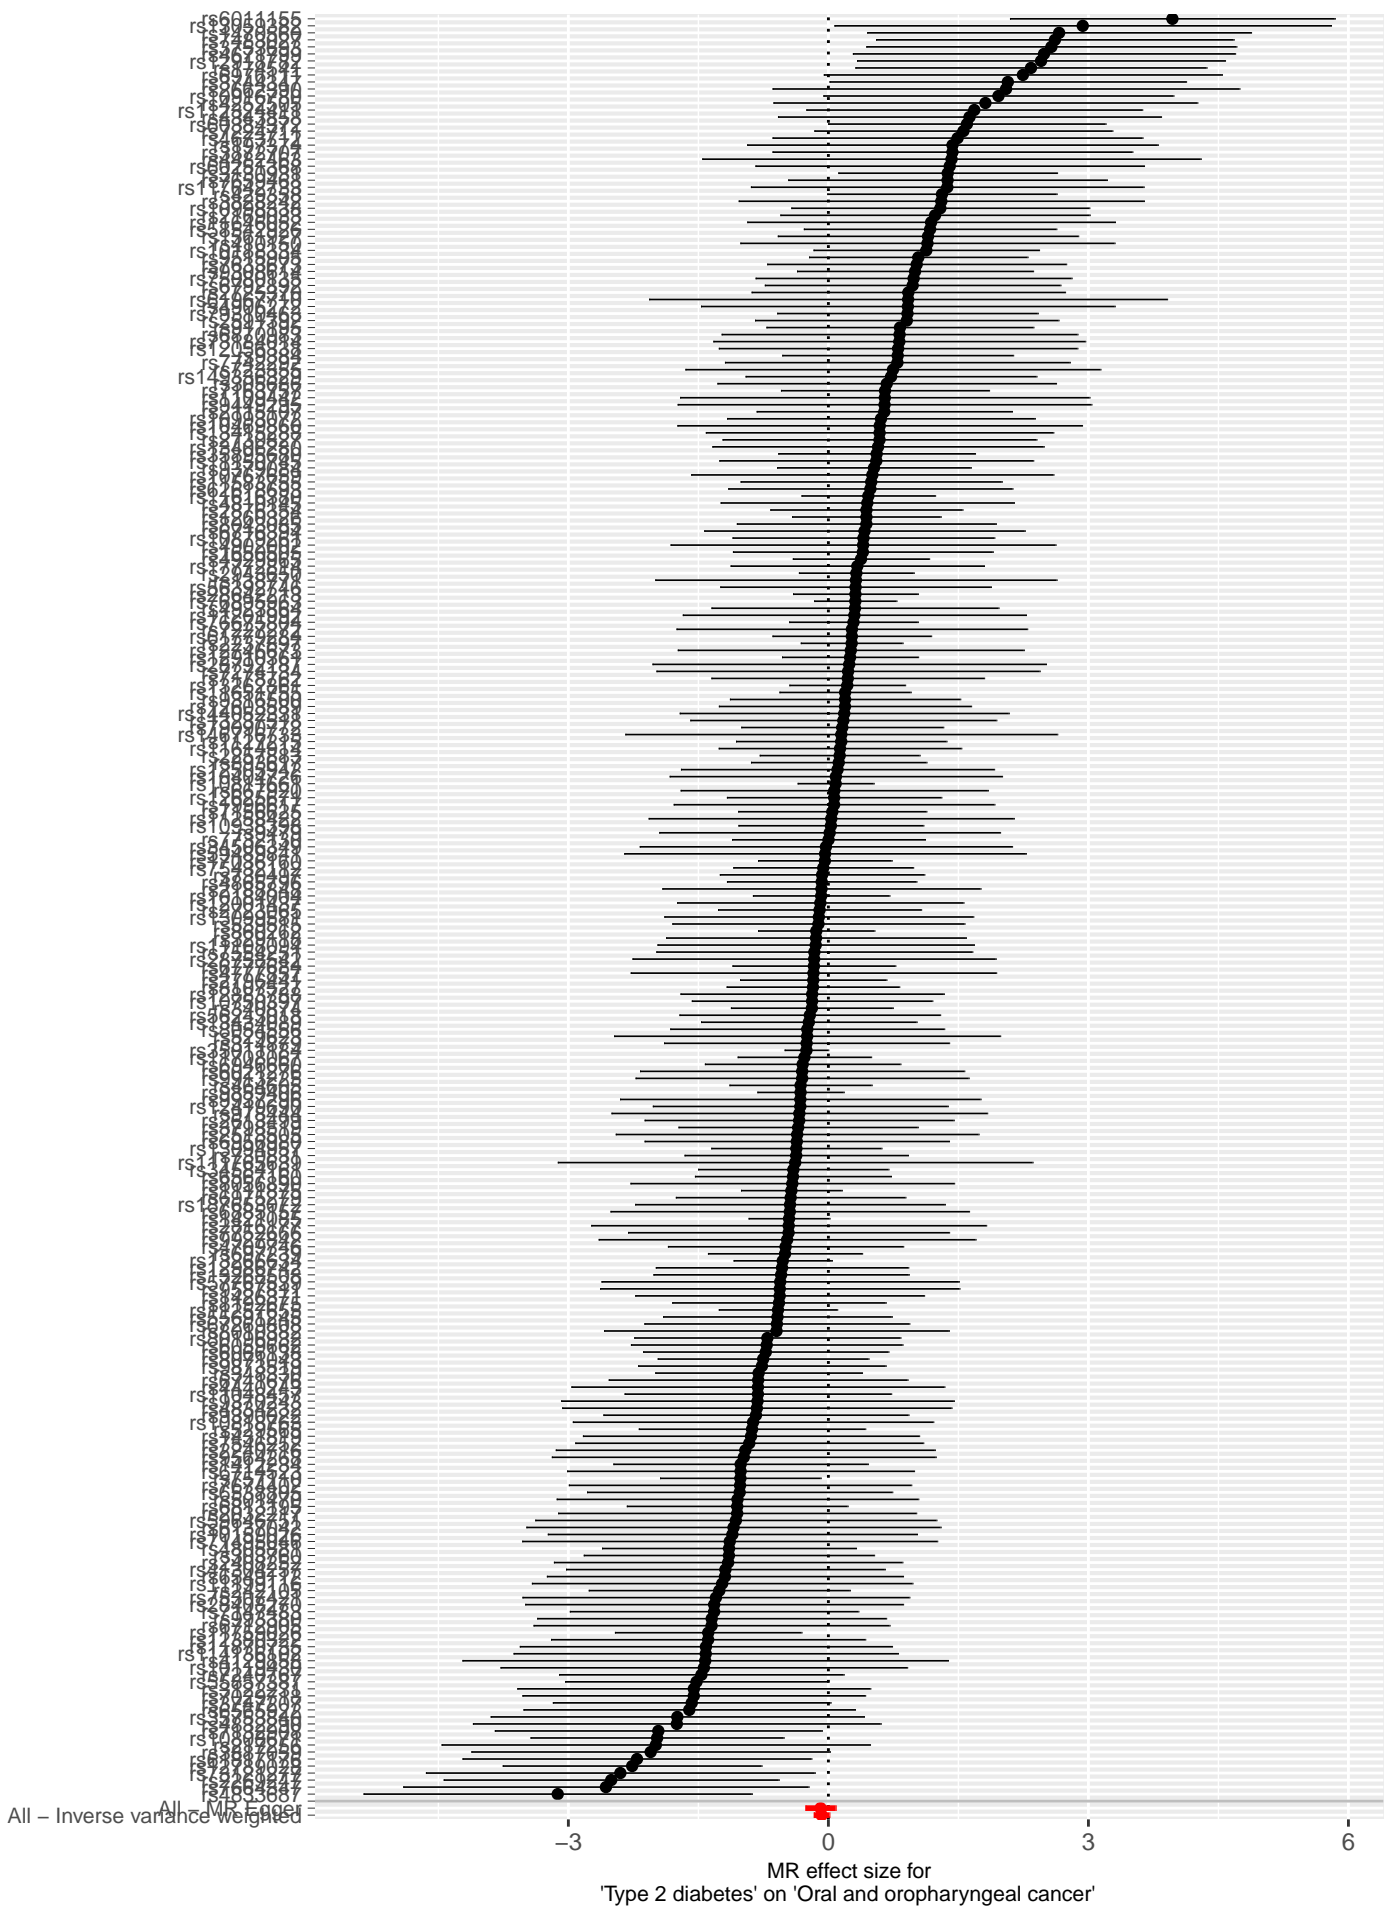

Supplement: supp [file elife-82674-supp-v1.zip]

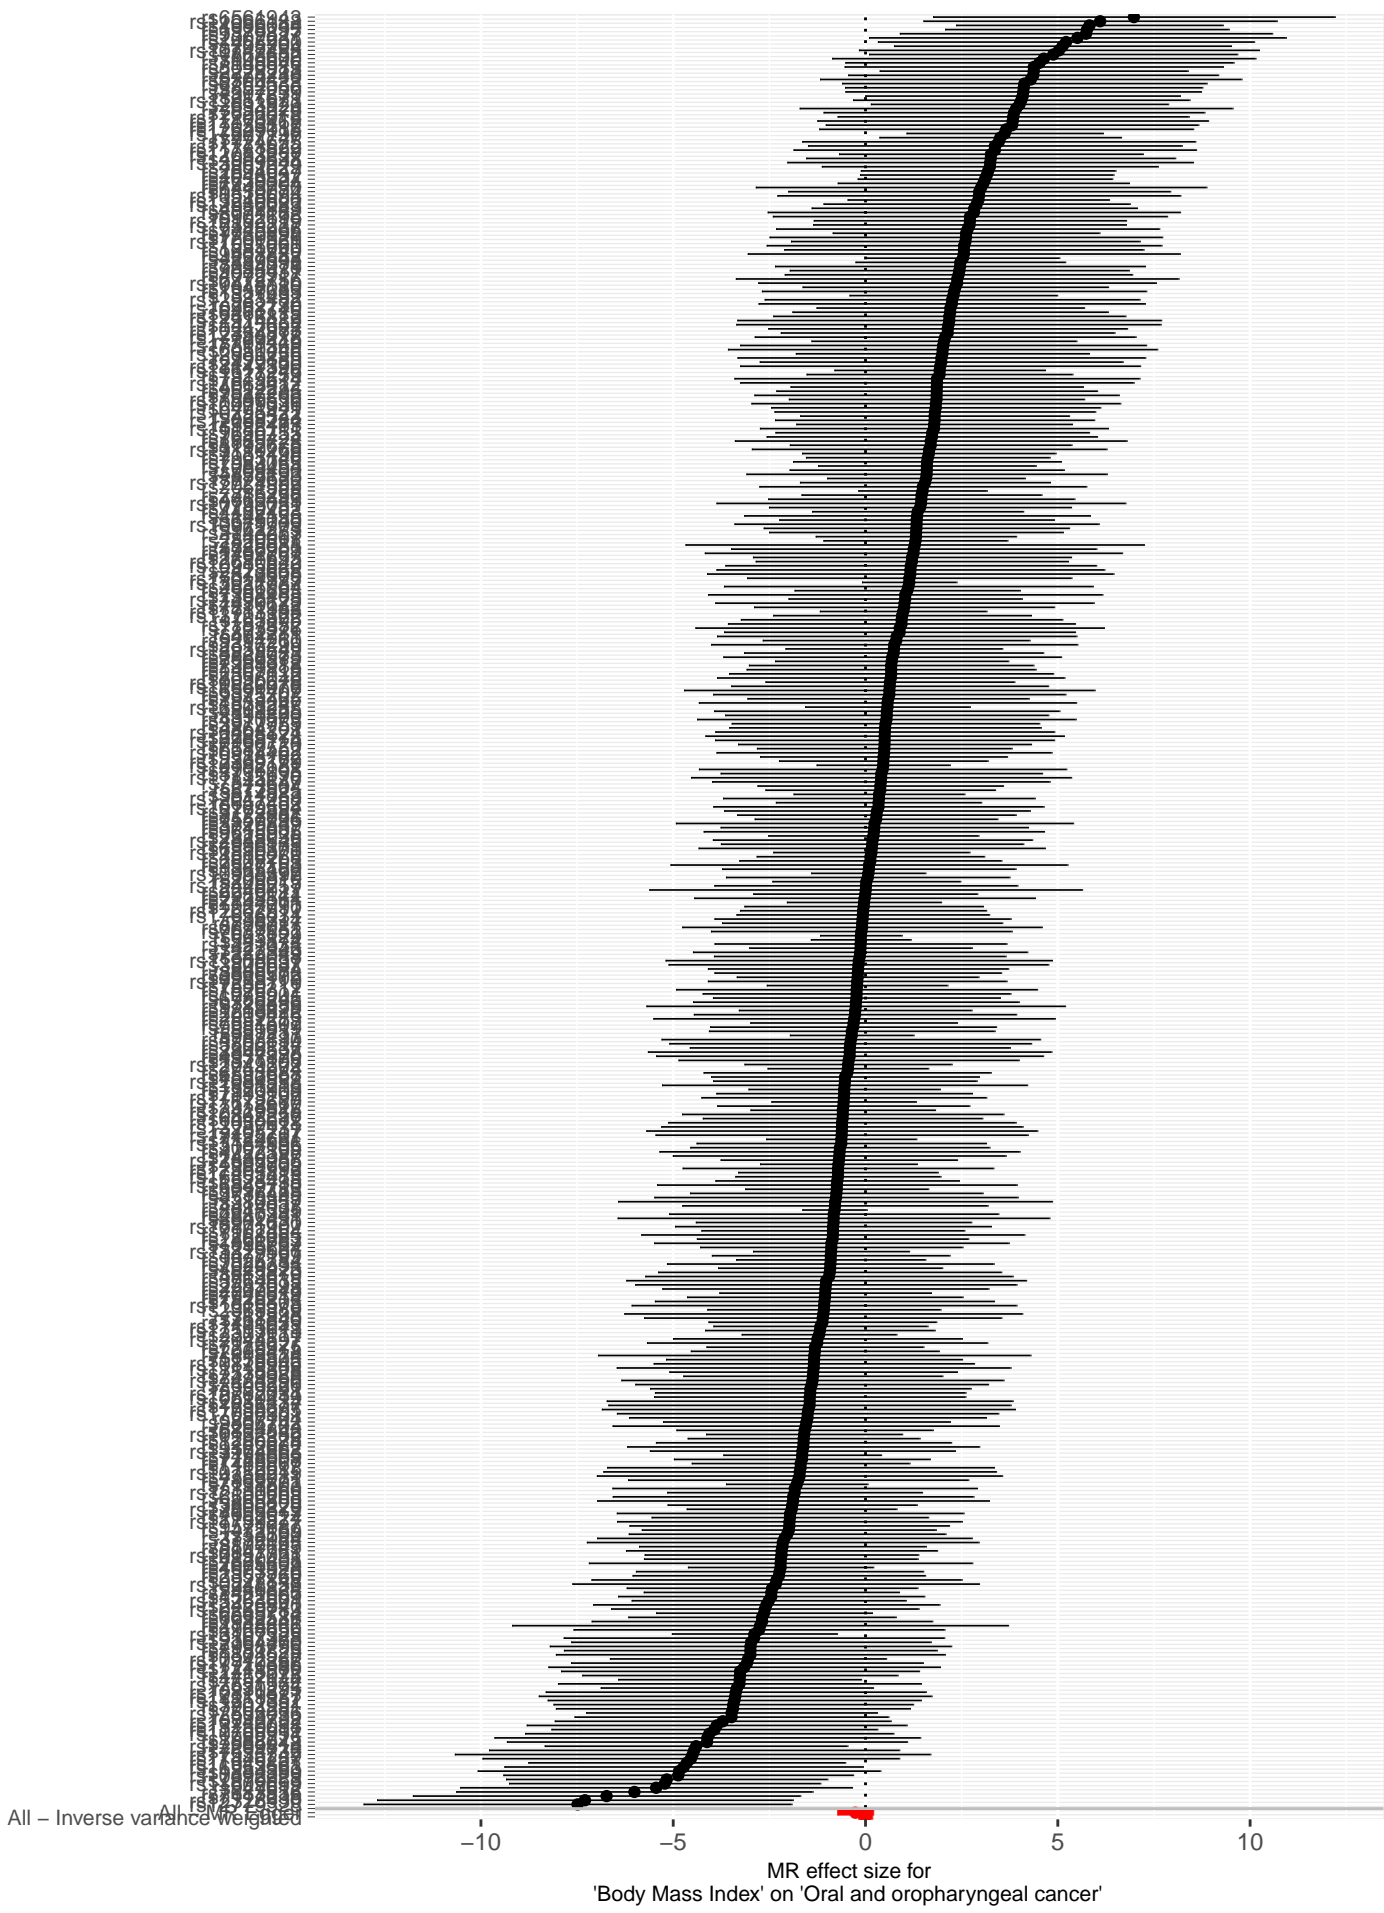

Supplement: supp [file elife-82674-supp-v1.zip]

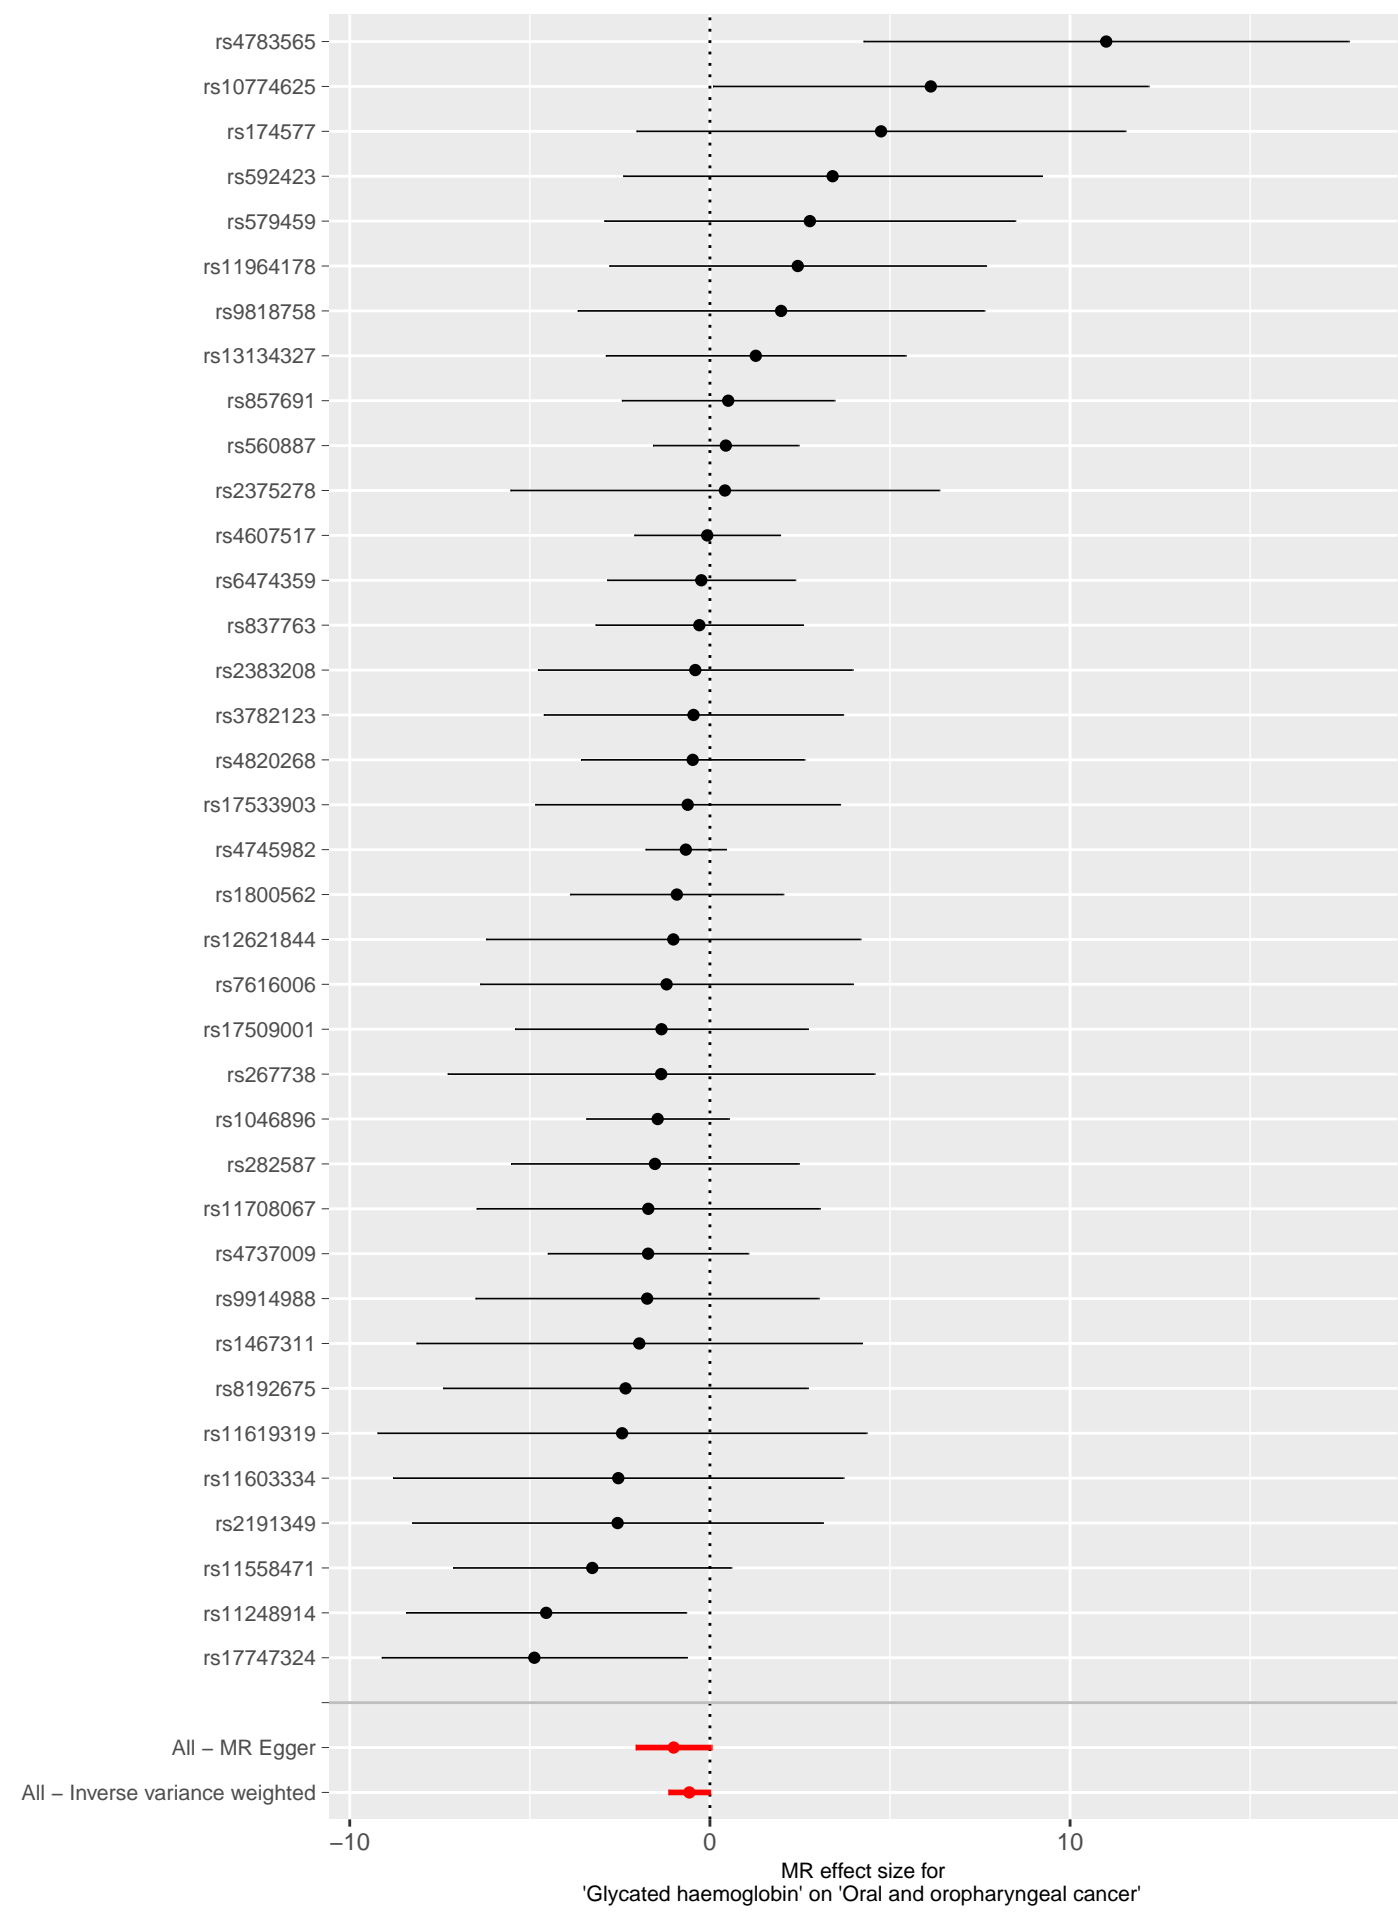

Supplement: supp [file elife-82674-supp-v1.zip]

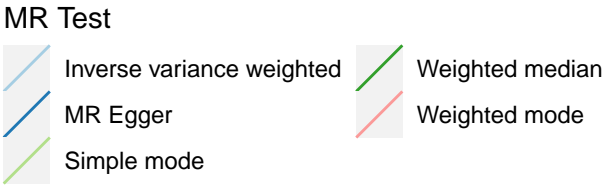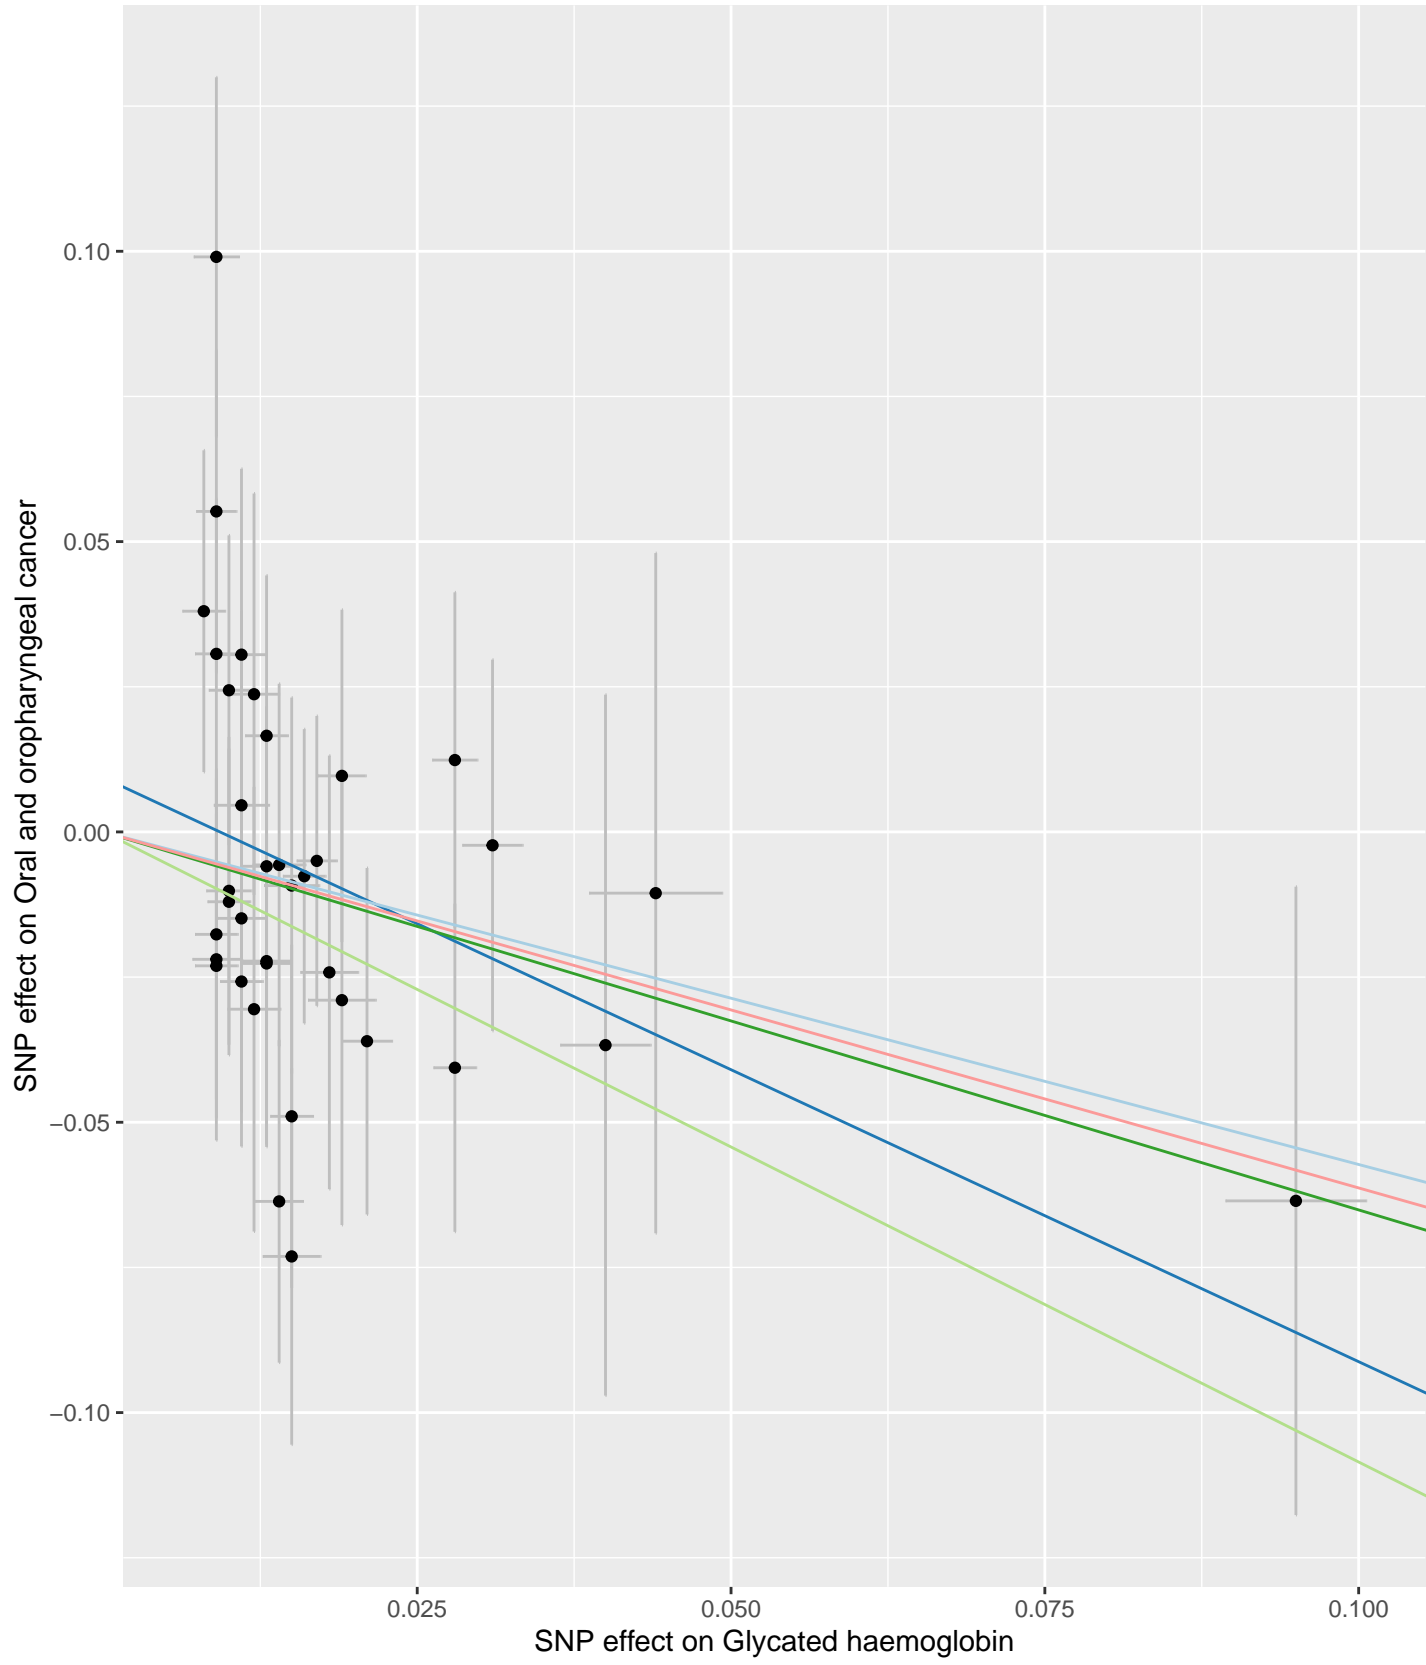

Supplement: supp [file elife-82674-supp-v1.zip]

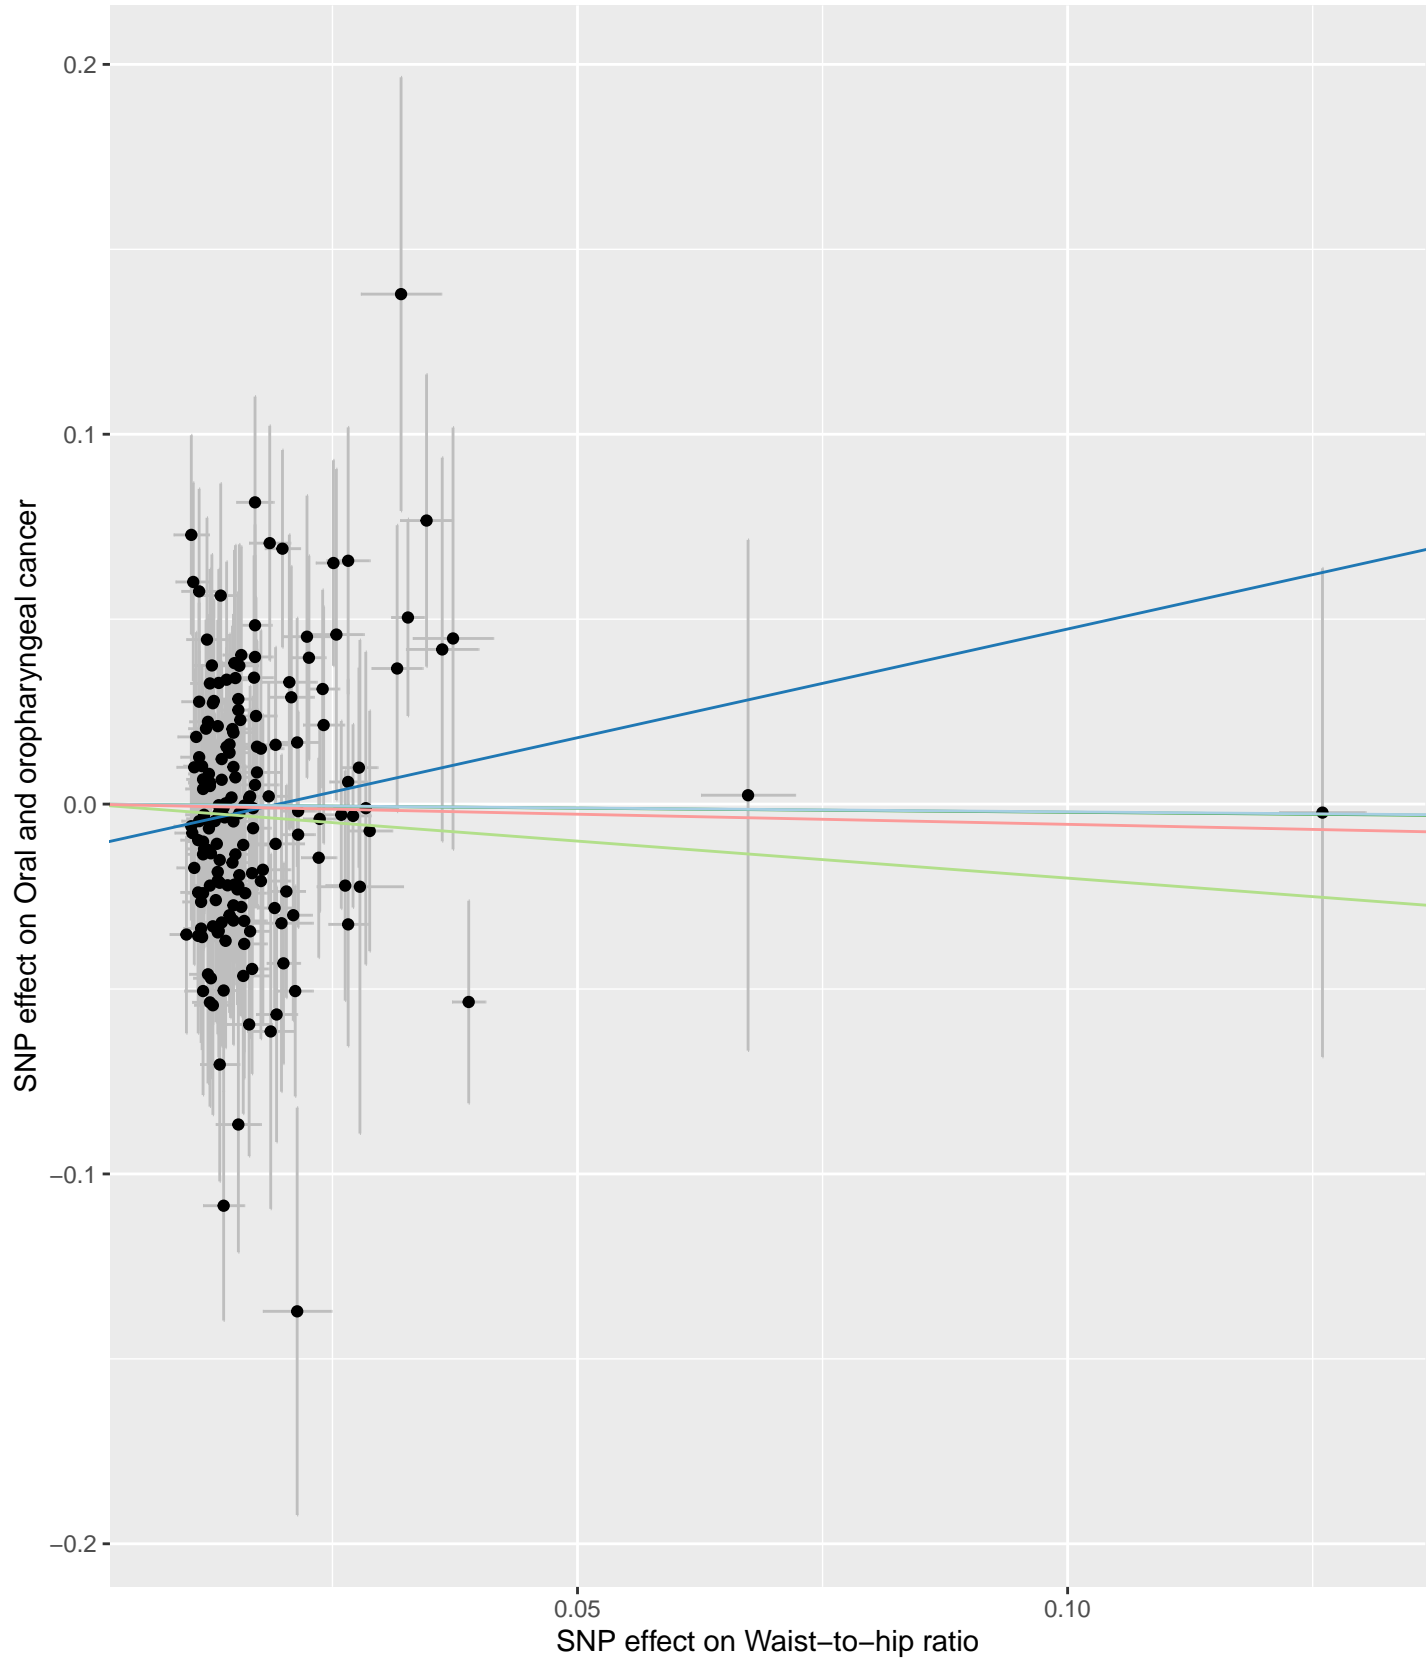

Supplement: supp [file elife-82674-supp-v1.zip]

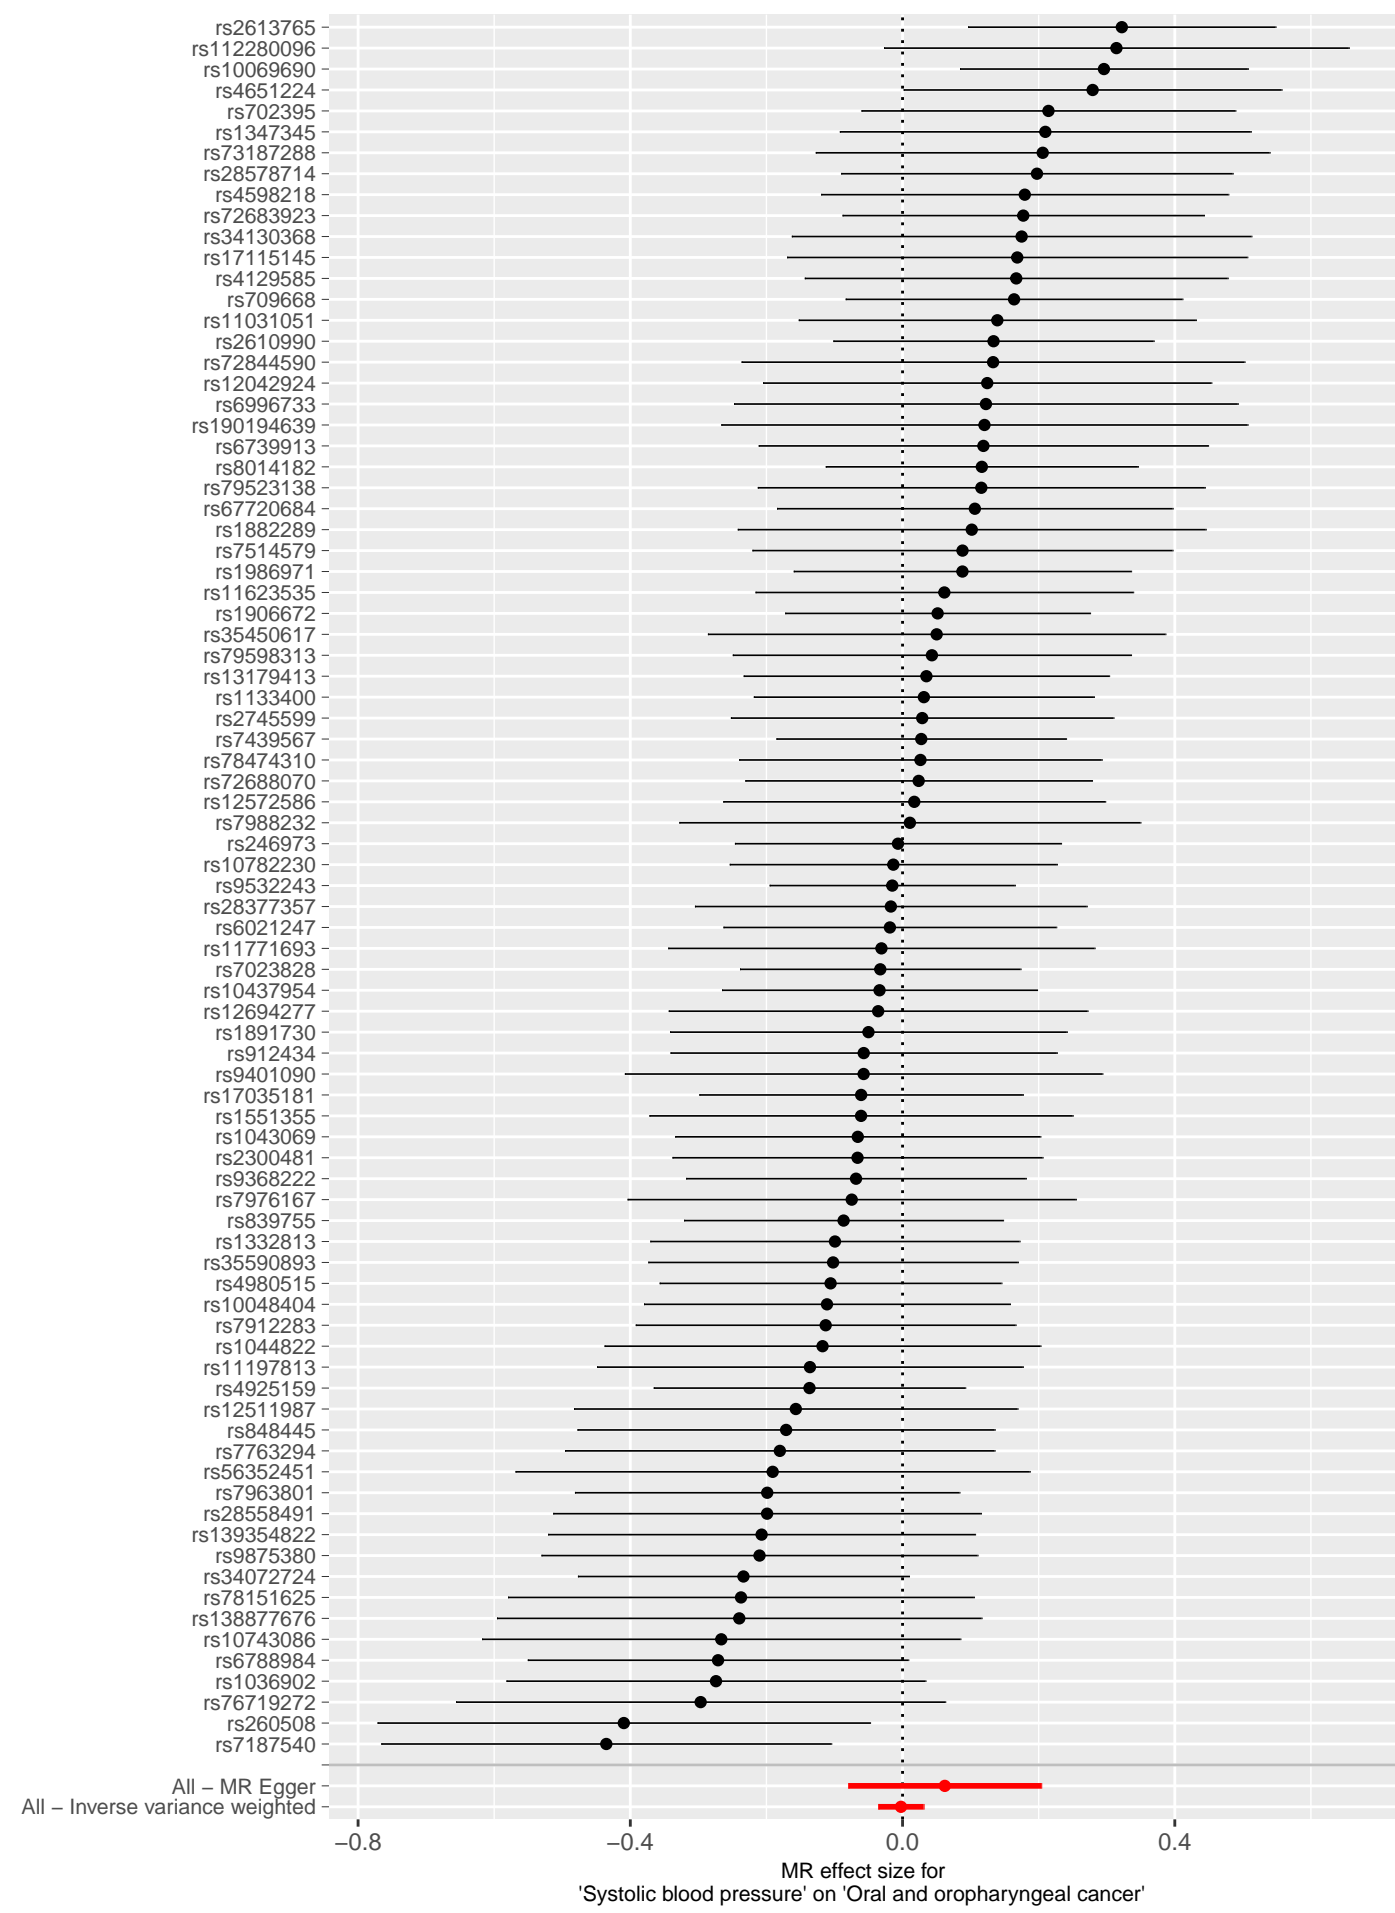

Supplement: supp [file elife-82674-supp-v1.zip]

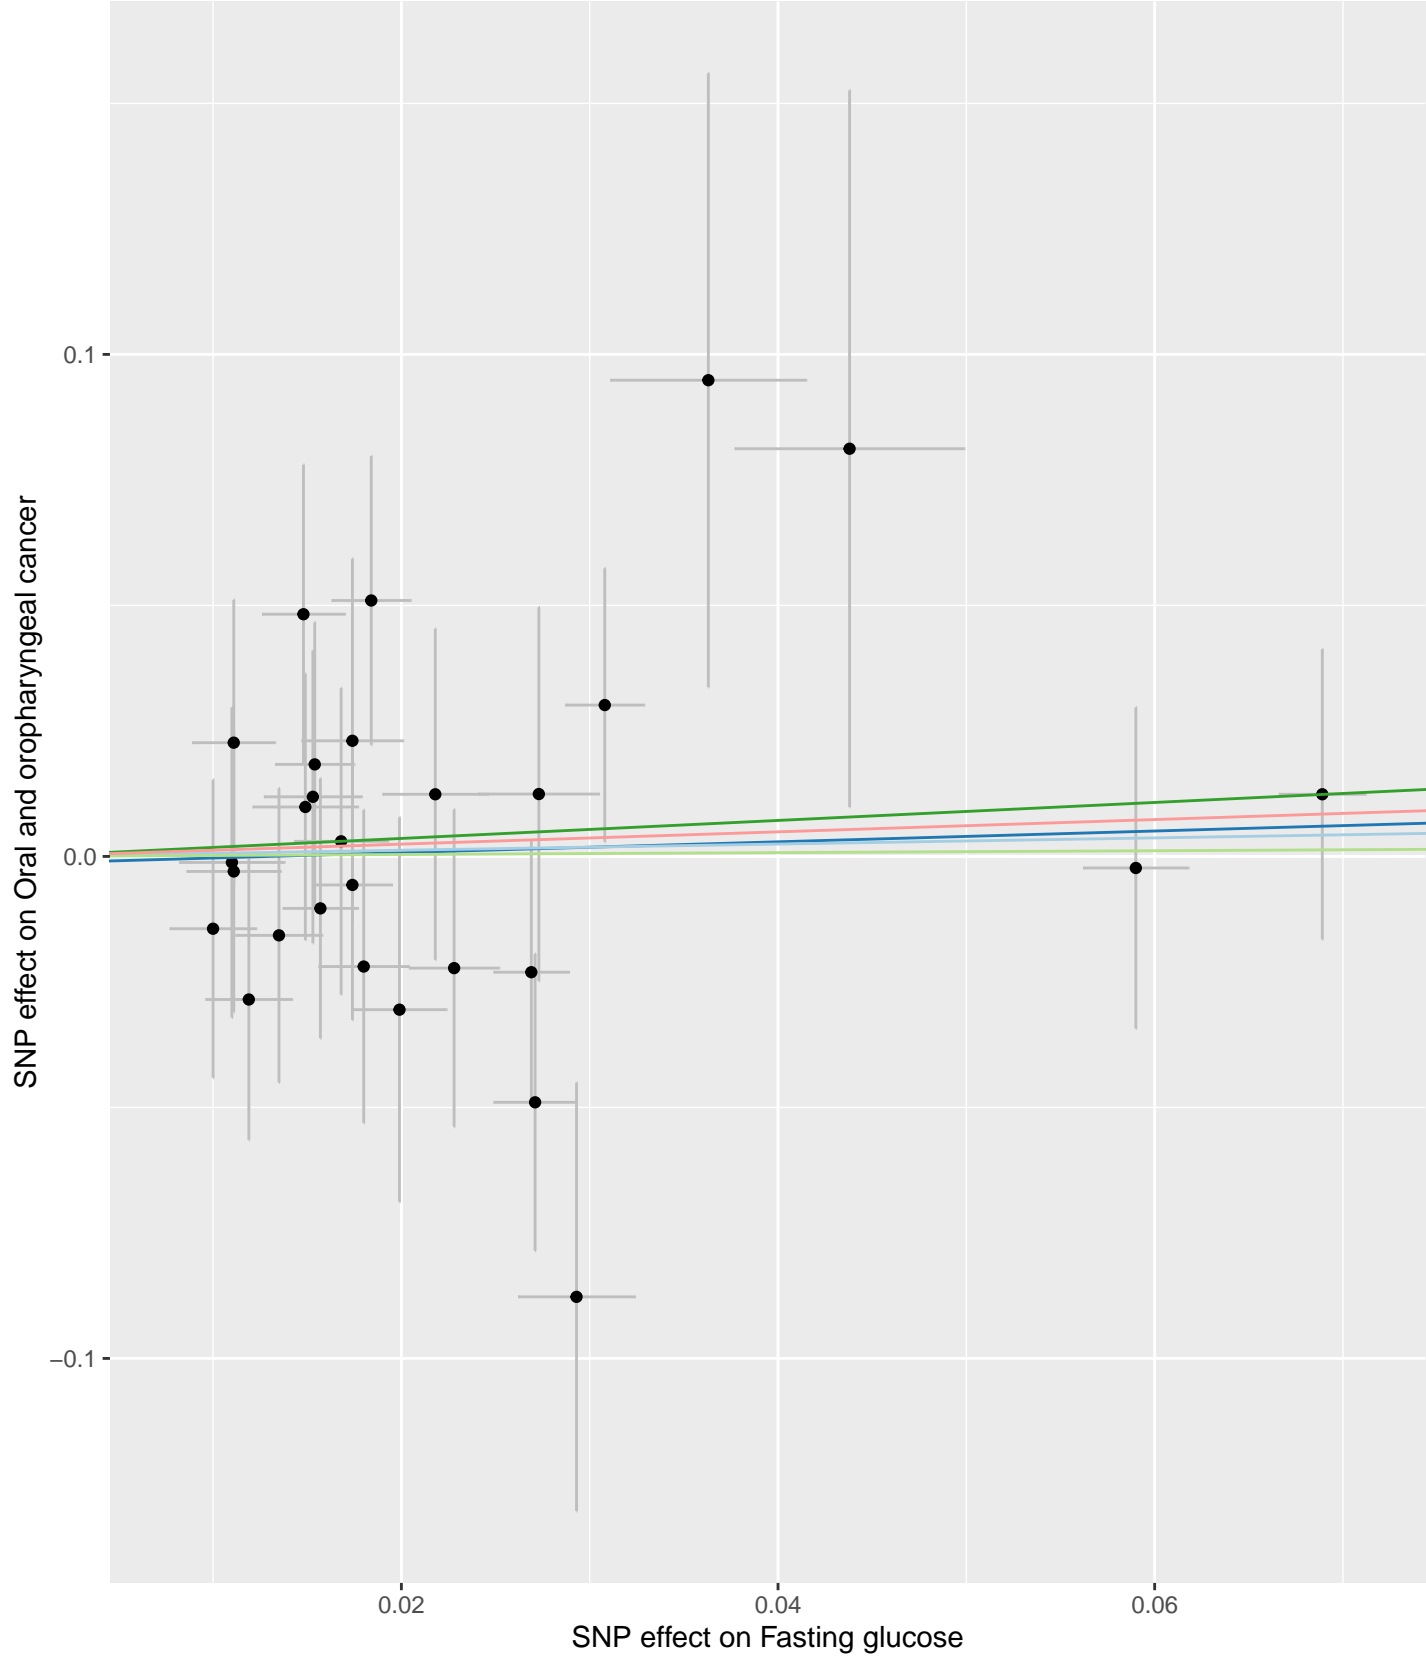

Supplement: supp [file elife-82674-supp-v1.zip]

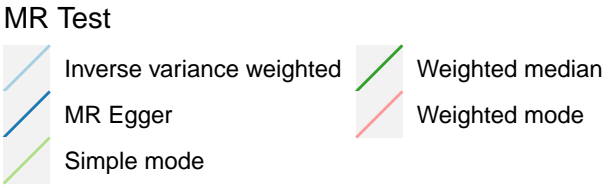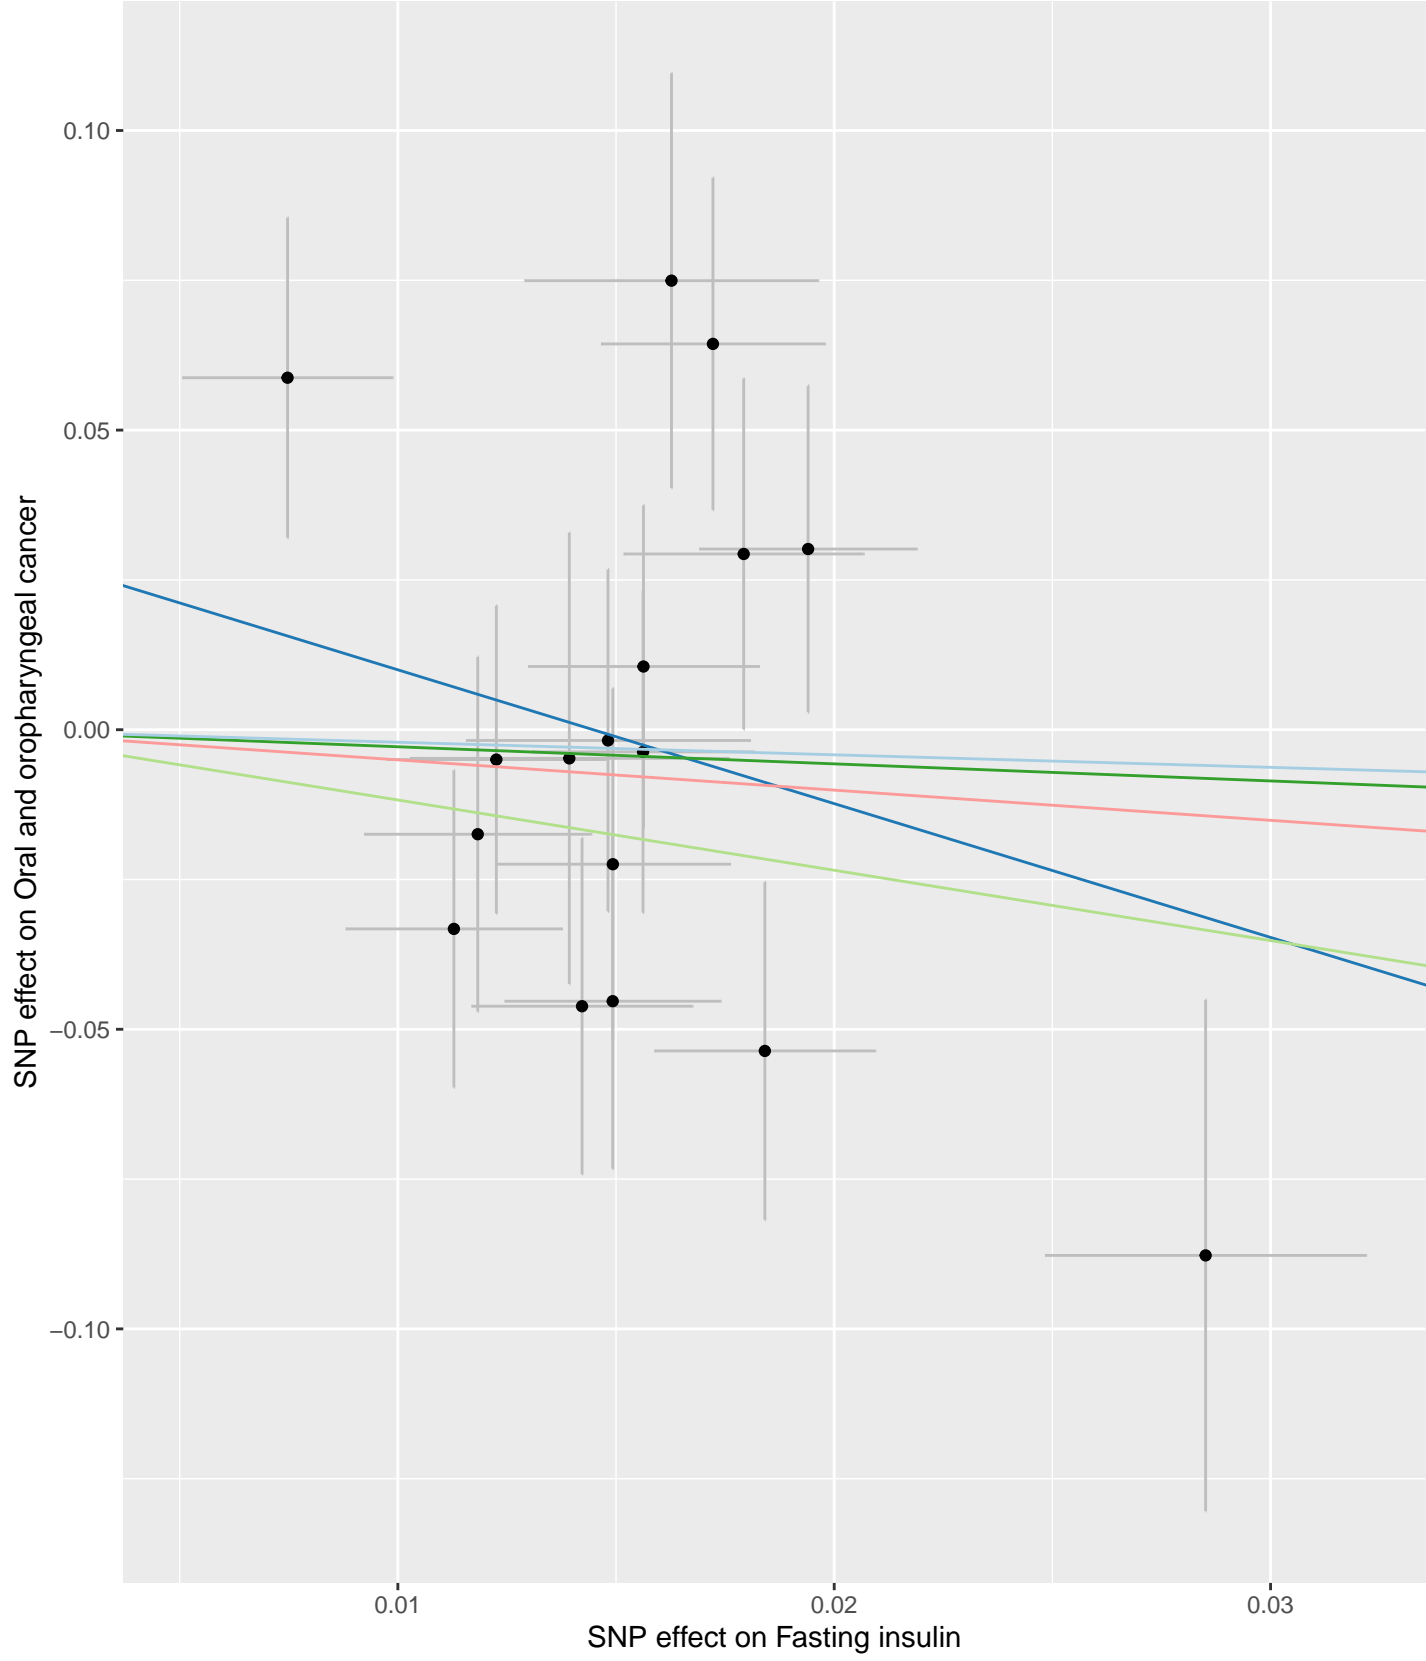

Supplement: supp [file elife-82674-supp-v1.zip]

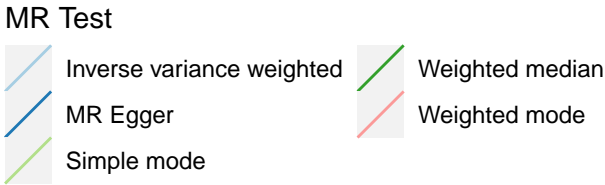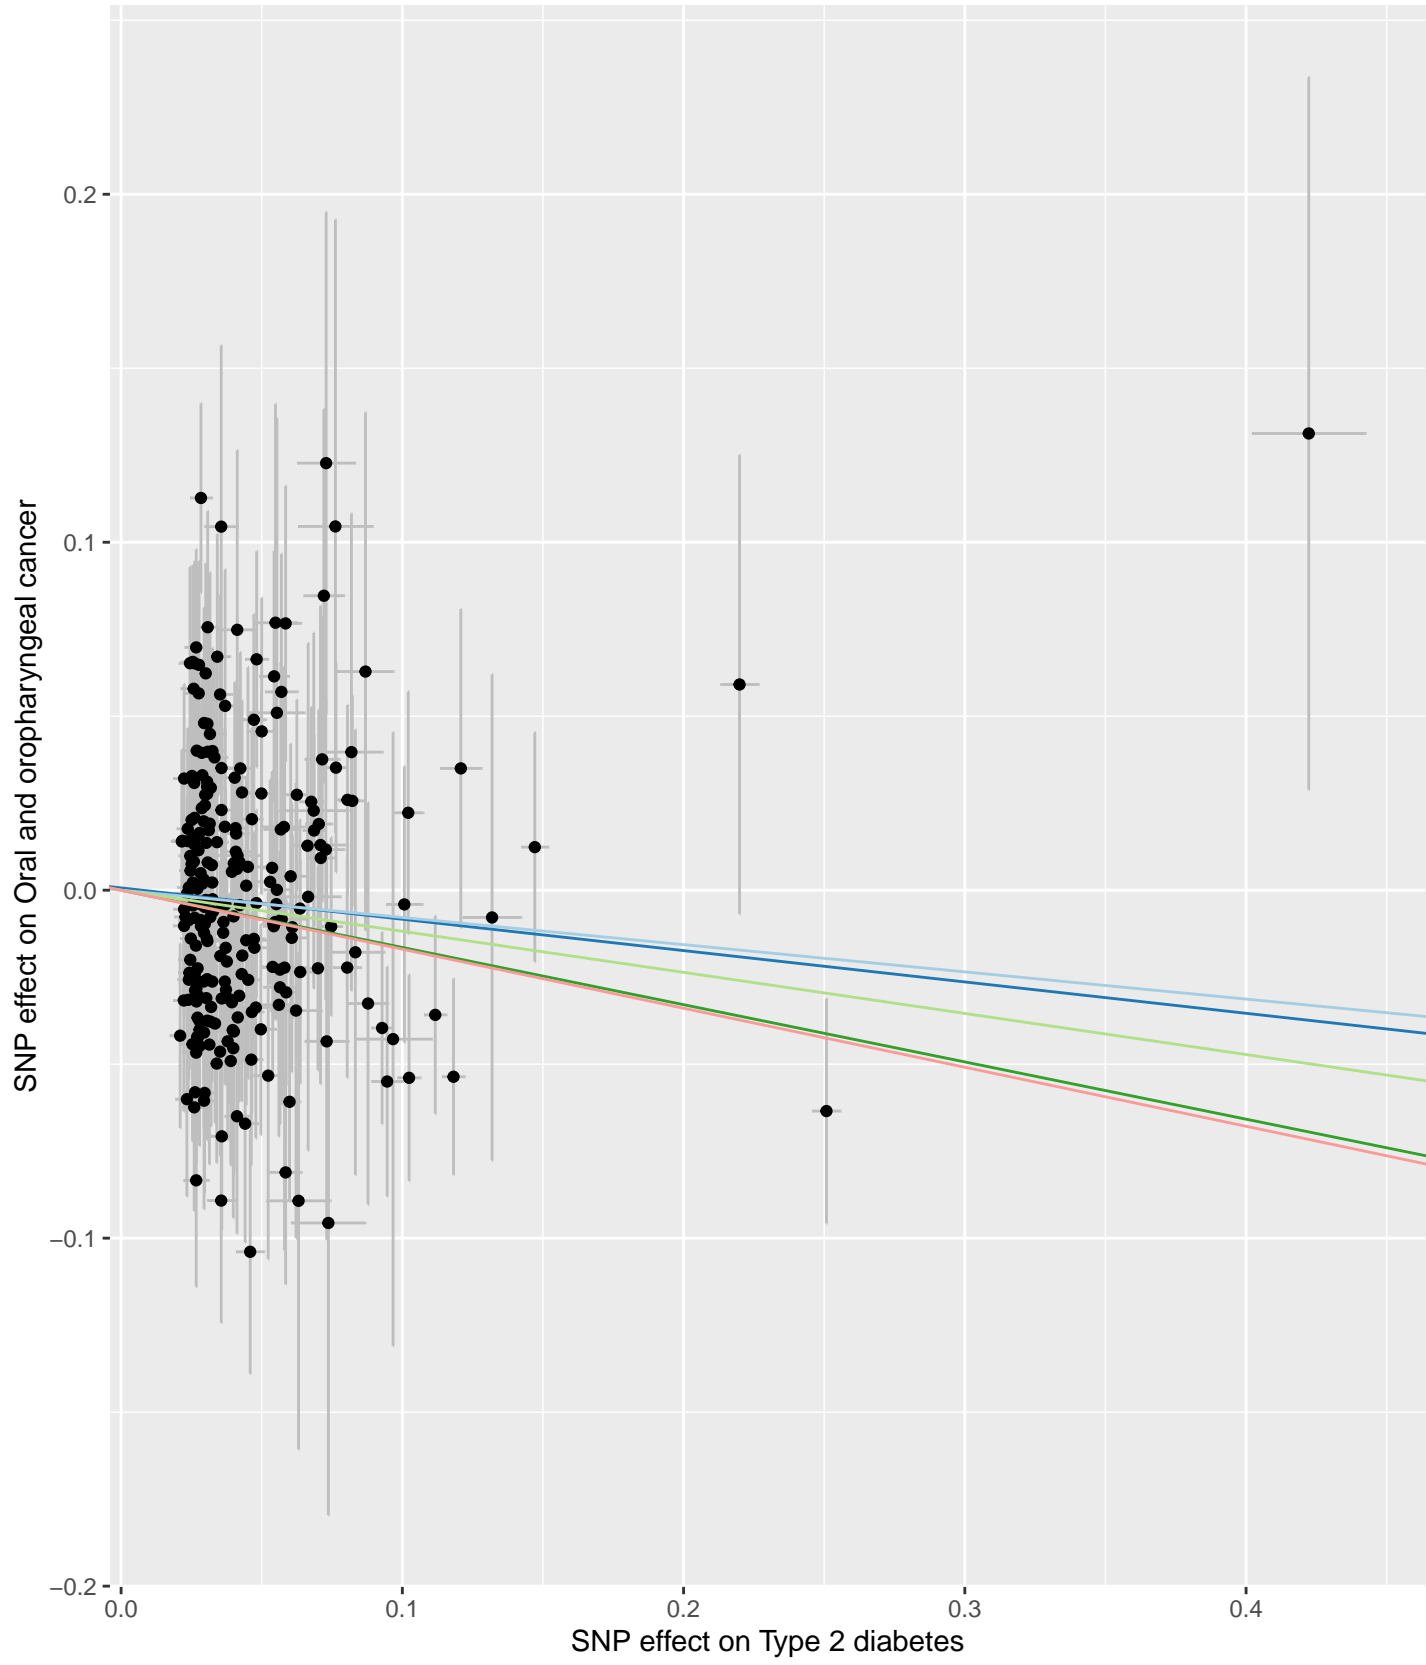

Supplement: supp [file elife-82674-supp-v1.zip]

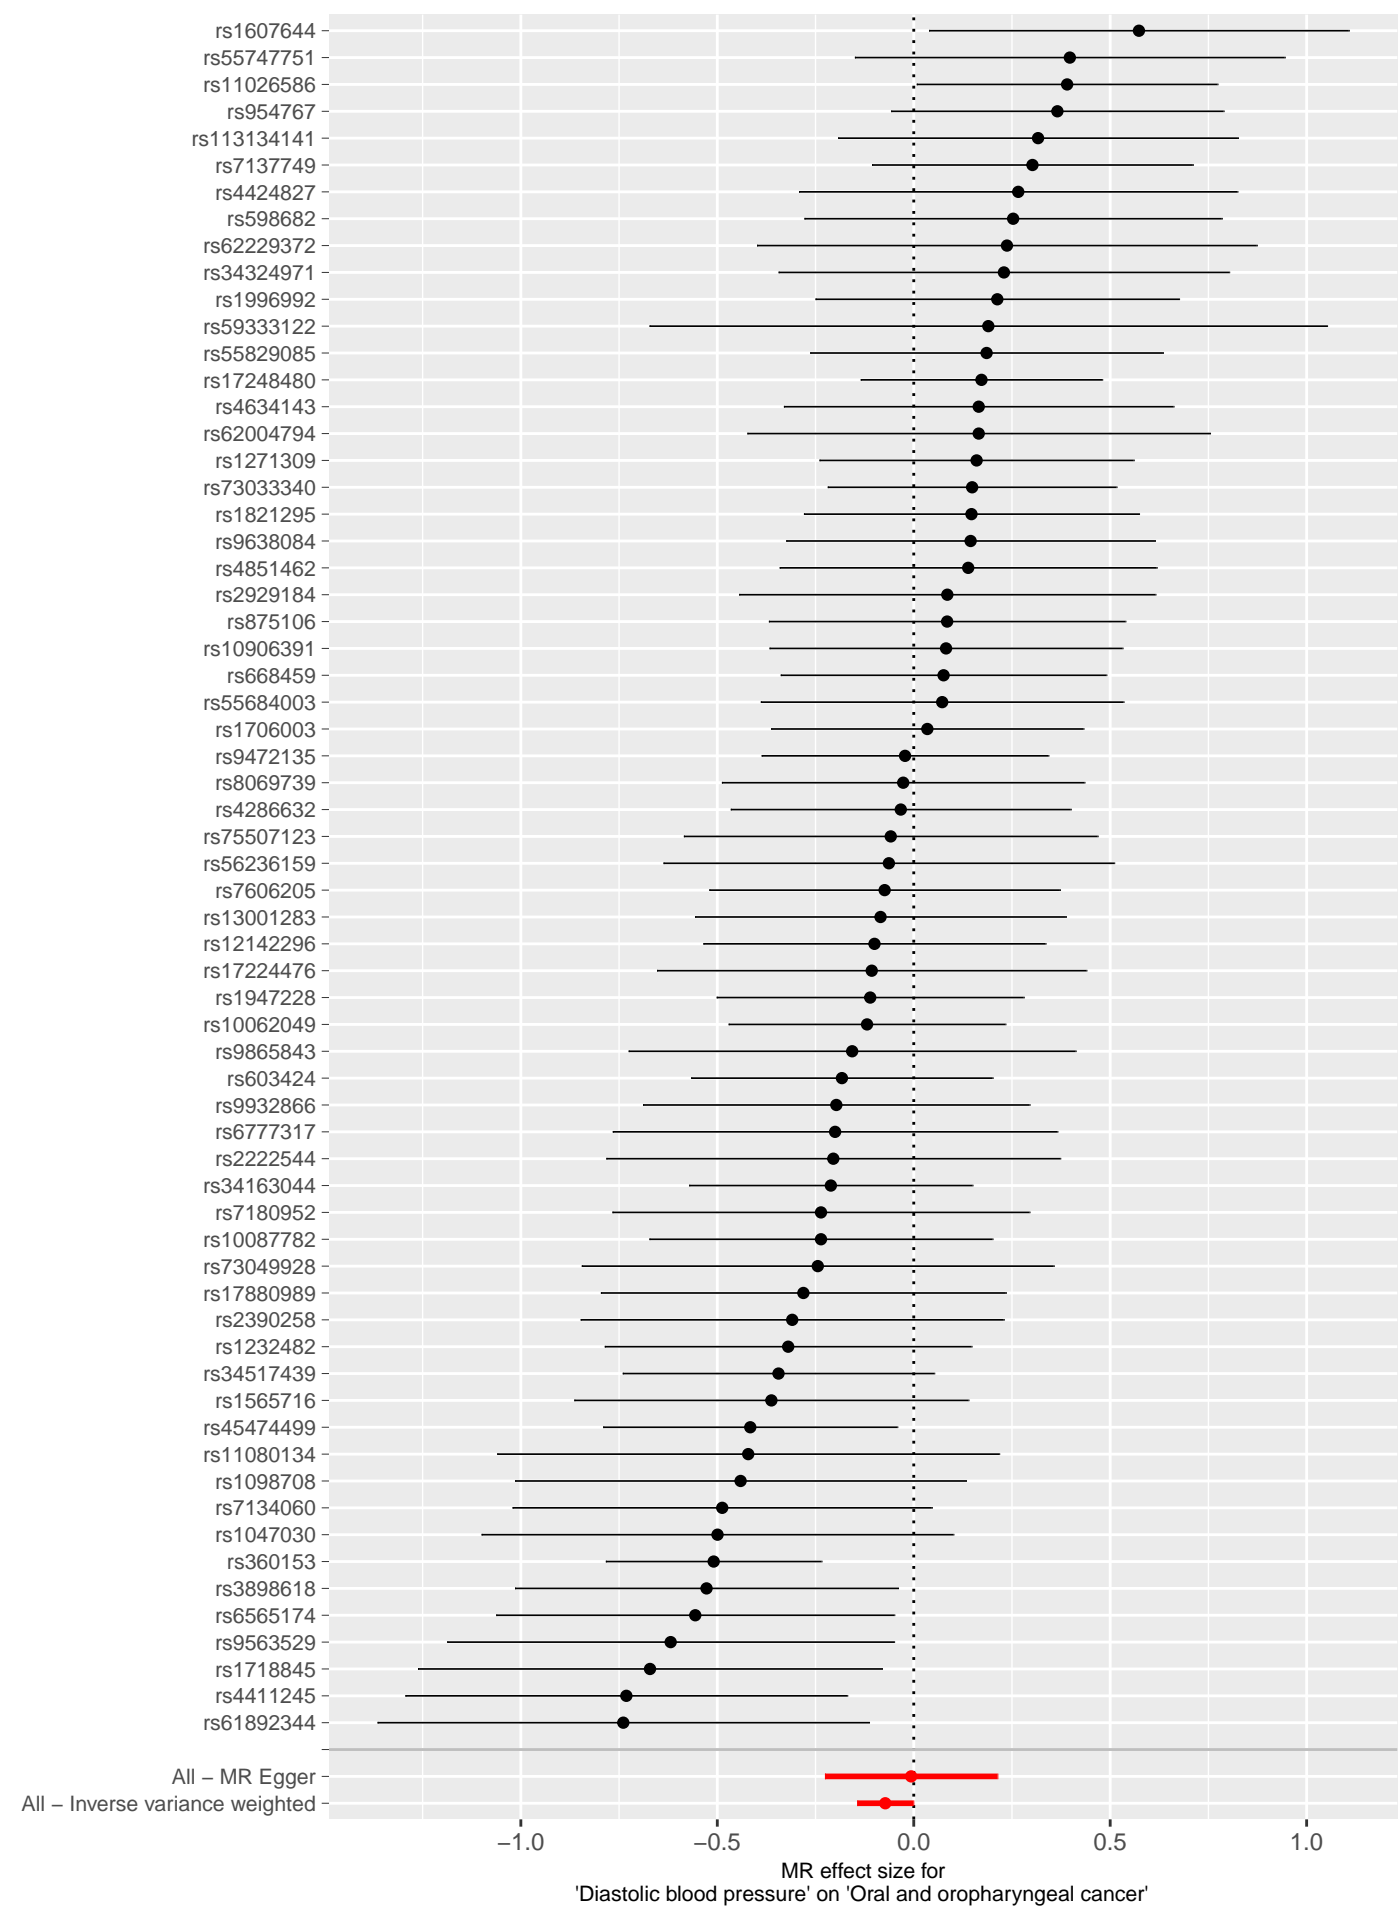

Supplement: supp [file elife-82674-supp-v1.zip]

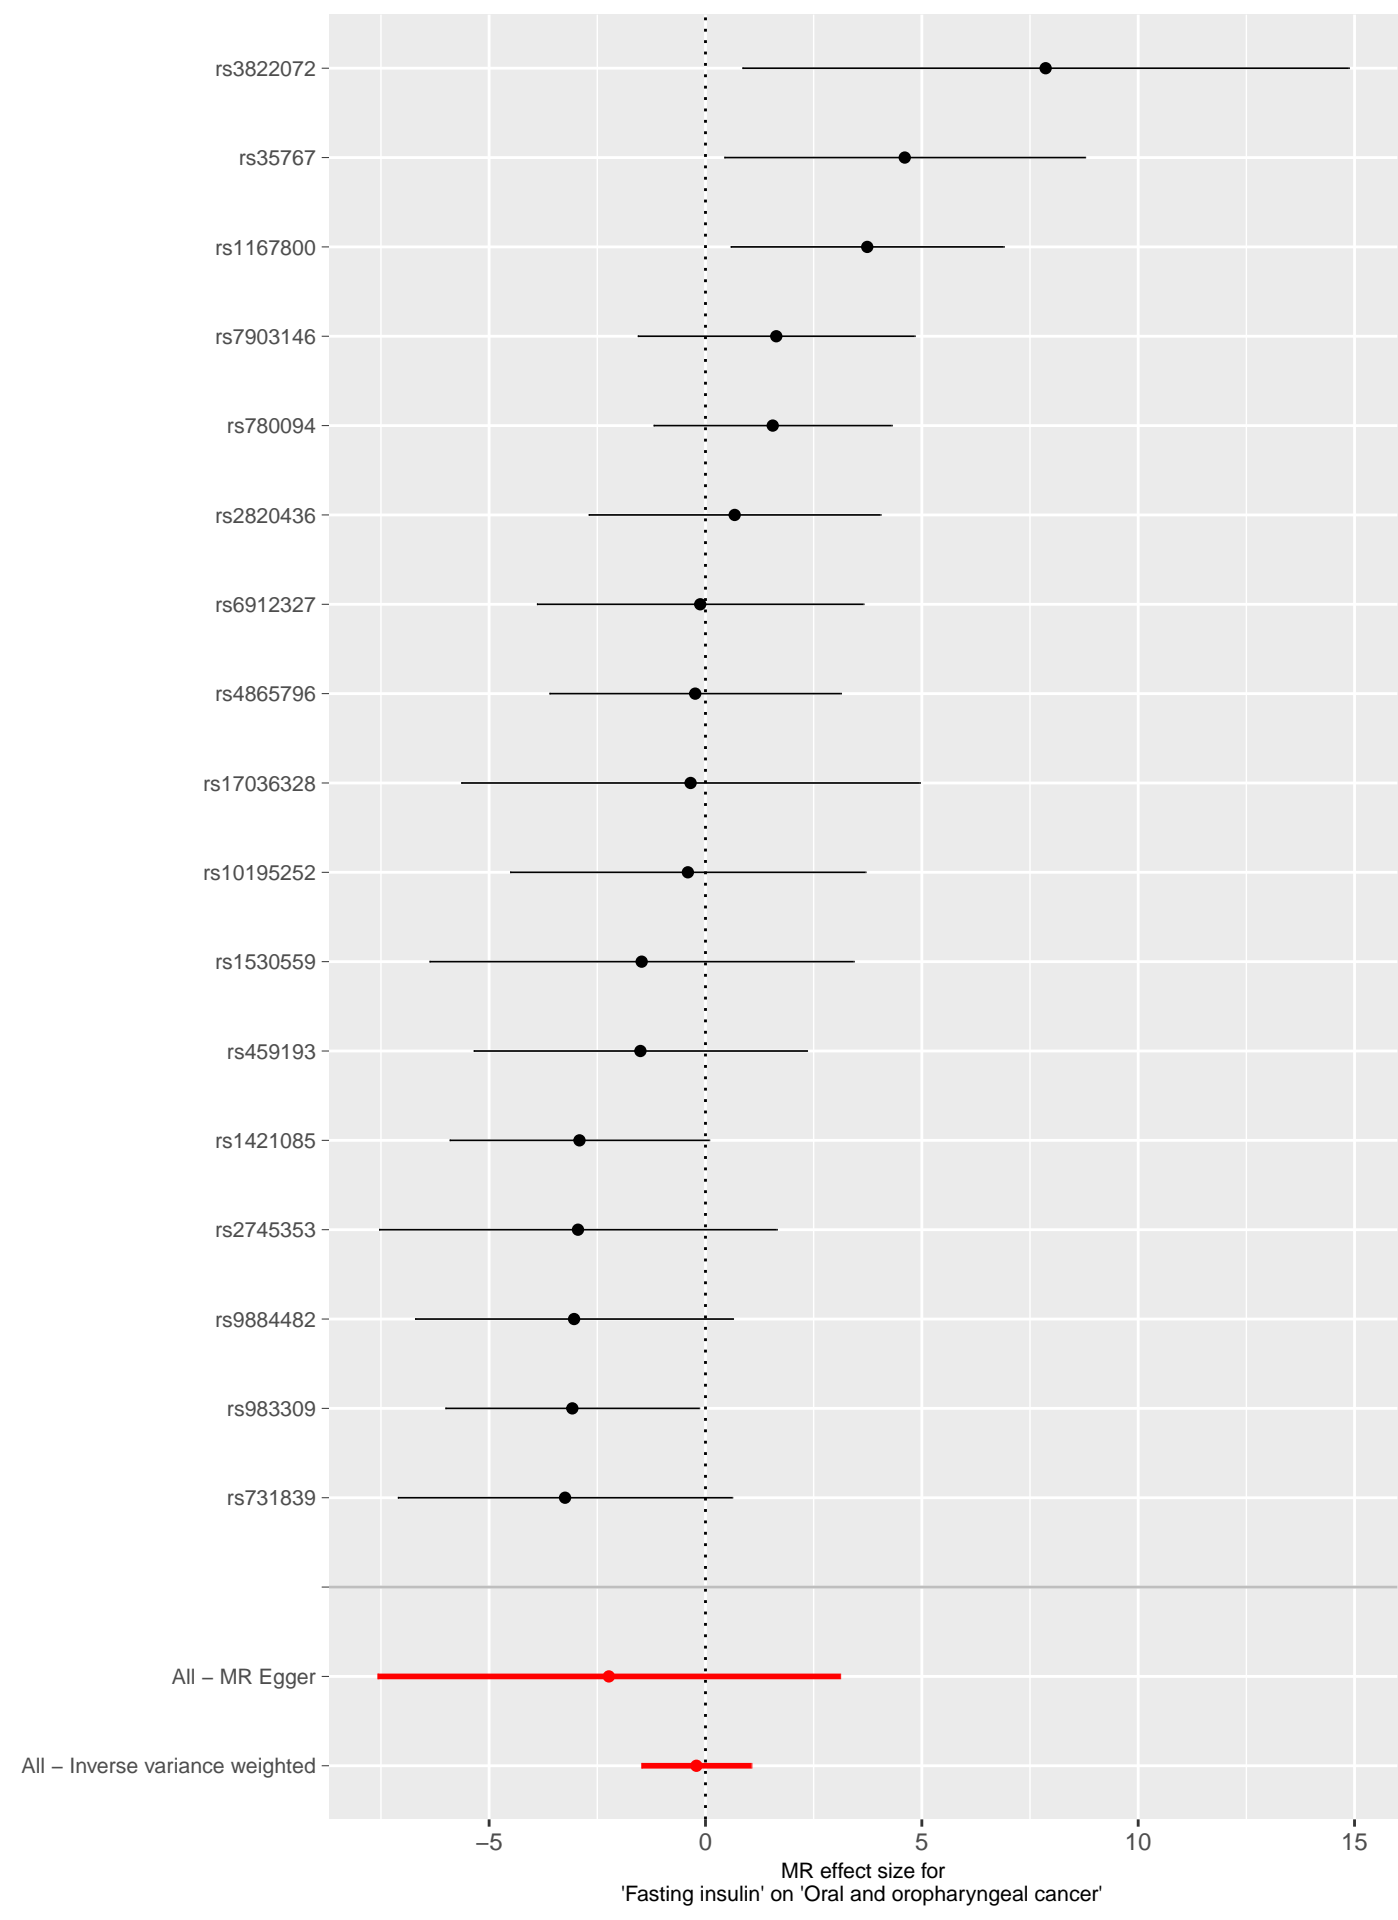

Supplement: supp [file elife-82674-supp-v1.zip]
